# Supplementary material for: Insect Transcription Factors: A Landscape of Their Structures and Biological Functions in Drosophila and beyond
Source: PubMed Central journal article supplement (PMC6274879; doi:10.3390/ijms19113691), 2018-11-21
Supplement: ijms-19-03691-s001.pdf [file ijms-19-03691-s001.pdf]

**Table S1.** The structures and functions of current documented transcription factors in diverse insects.

| TFs <sup>a</sup>     | Structures <sup>b</sup> | Species                                | Target genes                   | Functions                                                              | References <sup>c</sup> |
|----------------------|-------------------------|----------------------------------------|--------------------------------|------------------------------------------------------------------------|-------------------------|
| Abd-A                | A                       | <i>Bombyx mori</i>                     | <i>WCP4</i>                    | Cuticle protein synthesis                                              | [1,2]                   |
|                      |                         | <i>Drosophila melanogaster</i>         | —                              | NB apoptosis and quintessence                                          | [3,4]                   |
|                      |                         | <i>Manduca sexta</i>                   | —                              | The expression patterns in the embryos                                 | [5]                     |
|                      |                         | <i>Plutella xylostella</i>             | —                              | Abdominal segment development                                          | [6]                     |
|                      |                         | <i>Spodoptera litura</i>               | —                              | Embryonic development                                                  | [7]                     |
| Abd-B                | A                       | <i>Bombyx mori</i>                     | —                              | Mating structure                                                       | [8]                     |
|                      |                         | <i>Drosophila melanogaster</i>         | —                              | Inhibition of specific NB formation in the embryonic tail region       | [9]                     |
| AhR, ARNT            | B                       | <i>Drosophila melanogaster</i>         | <i>CYP6B1</i>                  | Xenobiotic response                                                    | [10]                    |
|                      |                         | <i>Aphis gossypii</i>                  | <i>CYP6DA2</i>                 | Gossypol tolerance                                                     | [11]                    |
|                      |                         | <i>Papilio polyxenes</i>               | <i>CYP6B1v3</i>                | Tolerance to toxic furanocoumarins                                     | [12,13]                 |
| Amos                 | B                       | <i>Drosophila melanogaster</i>         | —                              | Promoting olfactory sensory formation and inhibiting bristle formation | [14]                    |
| Antp                 | A                       | <i>Bombyx mori</i>                     | <i>sericin-3, fhxh4, fhxh5</i> | Silk synthesis                                                         | [15]                    |
|                      |                         |                                        | Silk gland specific genes      | The terminal differentiation of the silk gland                         | [16]                    |
|                      |                         | <i>Bicyclus anynana</i>                | —                              | Embryonic body plan and wing patterns                                  | [17,18]                 |
|                      |                         | <i>Drosophila melanogaster</i>         | —                              | NB quintessence                                                        | [3,4]                   |
|                      |                         |                                        | —                              | The role of YPWM motif in homeotic transformations                     | [19]                    |
| <i>Manduca sexta</i> | —                       | The expression patterns in the embryos | [5]                            |                                                                        |                         |
| AP-4                 | B                       | <i>Drosophila melanogaster</i>         | —                              | Tracheal terminal branching and cell growth                            | [20]                    |
|                      |                         | <i>Helicoverpa armigera</i>            | <i>DH-PBAN</i>                 | Diapause                                                               | [21]                    |
| Apt-like             | A                       | <i>Bombyx mori</i>                     | The single genetic <i>p</i>    | Larval pigment patterns                                                | [22]                    |

|             |   |                                                                                   | locus          |                                                         |            |
|-------------|---|-----------------------------------------------------------------------------------|----------------|---------------------------------------------------------|------------|
| Ase         | B | <i>Drosophila melanogaster</i>                                                    | —              | CNS development                                         | [23]       |
| ATF-2       | B | <i>Drosophila melanogaster</i>                                                    | —              | Fat metabolism                                          | [24]       |
| ATF-2, THAP | B | <i>Aedes aegypti</i>                                                              | SCP-2          | Energy metabolism                                       | [25]       |
| ATF-3       | B | <i>Drosophila melanogaster</i>                                                    | Or47b          | Olfactory system                                        | [26]       |
|             |   |                                                                                   | —              | Metamorphosis                                           | [27]       |
|             |   |                                                                                   | —              | Immune and metabolic homeostasis                        | [28]       |
| Ato         | B | <i>Drosophila melanogaster</i>                                                    | —              | Chordotonal organs formation                            | [29]       |
|             |   | <i>Bombyx mori</i>                                                                | —              | Molecular cloning and characterization of <i>ato</i>    | [30,31]    |
| Awh         | A | <i>Bombyx mori</i>                                                                | <i>fibH</i>    | Silk protein synthesis                                  | [16,32,33] |
| Bcd         | A | <i>Drosophila melanogaster</i>                                                    | —              | Embryonic axis establishment                            | [34,35]    |
| BCFI, BCFII | C | <i>Bombyx mori</i>                                                                | chorionic gene | Regulation of chorionic gene expression                 | [36]       |
| bHLH TFs    | B | <i>Aedes aegypti</i><br><i>Anopheles gambiae</i><br><i>Culex quinquefasciatus</i> | —              | Genome-wide identification                              | [37]       |
|             |   | <i>Acyrtosiphon pisum</i>                                                         | —              | Genome-wide identification                              | [38]       |
|             |   | <i>Apis mellifera</i>                                                             | —              | Genome-wide identification                              | [39]       |
|             |   | <i>Bombyx mori</i>                                                                | —              | Genome-wide identification                              | [40]       |
|             |   | <i>Diaphorina citri</i>                                                           | —              | Genome-wide identification                              | [41]       |
|             |   | <i>Drosophila melanogaster</i>                                                    | —              | Study of the origin and diversification of the bHLH TFs | [42]       |
|             |   | <i>Harpegnathos saltator</i>                                                      | —              | Genome-wide identification                              | [43]       |
|             |   | <i>Leptinotarsa decemlineata</i>                                                  | —              | Genome-wide identification                              | [44]       |
|             |   | <i>Nasonia vitripennis</i>                                                        | —              | Genome-wide identification                              | [45]       |
|             |   | <i>Nilaparvata lugens</i>                                                         | —              | Genome-wide identification                              | [46]       |
|             |   | <i>Pediculus humanus corporis</i>                                                 | —              | Genome-wide identification                              | [47]       |

|                   |   |                                                     |                                                                         |                                                |                                             |         |
|-------------------|---|-----------------------------------------------------|-------------------------------------------------------------------------|------------------------------------------------|---------------------------------------------|---------|
|                   |   | <i>Plutella xylostella</i>                          | —                                                                       | Genome-wide identification                     | [48]                                        |         |
|                   |   | <i>Tribolium castaneum</i>                          | —                                                                       | Female reproduction                            | [49]                                        |         |
| BMFA              | D | <i>Bombyx mori</i>                                  | <i>P25</i>                                                              | Silk protein synthesis                         | [50]                                        |         |
| Bmx               | B | <i>Drosophila melanogaster</i>                      | —                                                                       | Fat metabolism                                 | [51,52]                                     |         |
| BrC               | C | <i>Aedes aegypti</i>                                | <i>vitellogenin</i>                                                     | Vitellogenesis                                 | [53–56]                                     |         |
|                   |   | <i>Bombyx mori</i>                                  | —                                                                       | Nuclear import of BrC                          | [57]                                        |         |
|                   |   | <i>Bombyx mori</i>                                  | —                                                                       | Post-transcription and -translation regulation | [58]                                        |         |
|                   |   | <i>Nilaparvata lugens</i>                           | —                                                                       | Ovary development                              | [59]                                        |         |
|                   |   | <i>Tribolium castaneum</i><br><i>Chrysopa perla</i> | —                                                                       | Metamorphosis                                  | [60]                                        |         |
| BrC-Z1            | C | <i>Drosophila melanogaster</i>                      | <i>Lcp65A-b, Edg78E</i>                                                 | Pupal cuticle protein synthesis                | [61]                                        |         |
|                   |   |                                                     | <i>phm, dib, sad</i>                                                    | Ecdysteroidogenesis                            | [62]                                        |         |
| BrC-Z2            | C | <i>Bombyx mori</i>                                  | <i>vitellogenin</i>                                                     | Reproduction                                   | [63,64]                                     |         |
|                   |   |                                                     | <i>WCP10, CPG13</i>                                                     | Cuticle protein synthesis                      | [65–67]                                     |         |
| BrC-Z2,<br>BrC-Z3 | C | <i>Drosophila melanogaster</i>                      | Activate <i>E75A</i> and repress <i>E75B</i> under nutritional shortage | Egg chamber apoptosis                          | [68]                                        |         |
| BrC-Z4            | C | <i>Drosophila melanogaster</i>                      | <i>npc1</i>                                                             | Ecdysteroidogenesis                            | [69]                                        |         |
|                   |   |                                                     | <i>Bombyx mori</i>                                                      | <i>WCP5</i>                                    | Cuticle protein synthesis                   | [70]    |
|                   |   |                                                     |                                                                         | <i>lebocin</i>                                 | Immune response                             | [71]    |
| Btd               | C | <i>Drosophila melanogaster</i>                      | <i>Pros</i>                                                             | Nervous system development                     | [72]                                        |         |
| Cad               | A | <i>Acyrtosiphon pisum</i>                           | —                                                                       | Early embryo development                       | [73]                                        |         |
|                   |   |                                                     | <i>Drosophila melanogaster</i>                                          | <i>ftz, spalt</i>                              | Embryonic development                       | [74–76] |
|                   |   |                                                     |                                                                         | AMPs                                           | Immune response and commensal-gut mutualism | [77–79] |
|                   |   |                                                     |                                                                         | —                                              | Embryo development                          | [9,35]  |

|       |                                                          |                                                  |                                                                                                |                                                                                                  |            |
|-------|----------------------------------------------------------|--------------------------------------------------|------------------------------------------------------------------------------------------------|--------------------------------------------------------------------------------------------------|------------|
|       |                                                          | <i>Bombyx mori</i>                               | <i>eve</i>                                                                                     | Embryo body segmentation                                                                         | [80]       |
| Cato  | B                                                        | <i>Drosophila melanogaster</i>                   | —                                                                                              | Sensory neuron morphology                                                                        | [81]       |
| CbZ   | B                                                        | <i>Bombyx mori</i>                               | Chorion genes                                                                                  | Vitellogenesis                                                                                   | [82]       |
| C/EBP | B                                                        | <i>Drosophila melanogaster</i>                   | —                                                                                              | Embryogenesis; cell migration, apical constriction and epithelial invagination during oogenesis; | [83–85]    |
|       |                                                          | <i>Bombyx mori</i>                               | Chorion genes, itself                                                                          | Vitellogenesis; choriogenesis                                                                    | [82,86,87] |
|       |                                                          | <i>Anopheles gambiae</i><br><i>Aedes aegypti</i> | <i>def</i>                                                                                     | Immune response                                                                                  | [88]       |
|       |                                                          | <i>Spodoptera litura</i>                         | <i>SlSCPx</i>                                                                                  | Energy metabolism                                                                                | [89]       |
| CncB  | B                                                        | <i>Drosophila melanogaster</i>                   | —                                                                                              | Segmental diversity in the head                                                                  | [90]       |
| CncC  | B                                                        | <i>Drosophila melanogaster</i>                   | <i>nvd, spok, dib, sad</i>                                                                     | Ecdysteroidogenesis                                                                              | [91]       |
|       |                                                          |                                                  | <i>gstD1, ref(2P), Atg8a</i>                                                                   | Oxidative stress response                                                                        | [92,93]    |
|       |                                                          |                                                  | <i>Cyp6a2, Cyp6a8, Jheh1, GstD2 and CG6188</i>                                                 | Response to phenobarbital (PB; malathion and DDT resistance)                                     | [94,95]    |
|       |                                                          |                                                  | <i>Cyp6a2</i>                                                                                  | DDT resistance                                                                                   | [96]       |
|       |                                                          |                                                  | <i>Jheh1</i> and <i>Jheh2</i><br>(Transposable element Bari-Jheh was added in their promoters) | Paraquat and malathion resistance                                                                | [97]       |
|       |                                                          |                                                  | —                                                                                              | Antioxidant response,; insecticide resistance; endocrine signaling and aging                     | [98,99]    |
|       |                                                          | <i>Tribolium castaneum</i>                       | CYP6BQ cluster genes                                                                           | Deltamethrin resistance                                                                          | [100]      |
|       | <i>CYP4G7, CYP4G14, GST-1, ABCA-UB, ABCAA1, ABCA-A1L</i> | Pyrethroid resistance                            | [101]                                                                                          |                                                                                                  |            |

|        |   |                                                     |                                                                              |                                                                                                                       |           |
|--------|---|-----------------------------------------------------|------------------------------------------------------------------------------|-----------------------------------------------------------------------------------------------------------------------|-----------|
|        |   |                                                     | and <i>ABCA-9B</i>                                                           |                                                                                                                       |           |
|        |   | <i>Leptinotarsa decemlineata</i>                    | <i>CYP6BJa/b</i> , <i>CYP6BJ1v1</i> ,<br><i>CYP9Z25</i> , and <i>CYP9Z29</i> | Imidacloprid resistance and adaptation to potato plant allelochemicals                                                | [102]     |
|        |   | <i>Aphis gossypii</i>                               | <i>CYP6DA2</i>                                                               | Gossypol tolerance                                                                                                    | [103]     |
|        |   | <i>Bombyx mori</i>                                  | —                                                                            | Response after phoxim and phoxim treatment                                                                            | [104,105] |
| Col    | B | <i>Drosophila melanogaster</i>                      | —                                                                            | Muscle identity and shape; multidendritic neuron differentiation; head development; blood cell progenitor maintenance | [106–110] |
| Crc    | B | <i>Drosophila melanogaster</i>                      | —                                                                            | Molting and metamorphosis                                                                                             | [111–113] |
| CREB   | B | <i>Drosophila melanogaster</i>                      | <i>period</i>                                                                | Circadian rhythm                                                                                                      | [114]     |
|        |   | <i>Drosophila melanogaster</i>                      | cAMP-response elements                                                       | Long-term memory                                                                                                      | [115,116] |
|        |   | <i>Bombyx mori</i>                                  | —                                                                            | Diapause process induced by environmental factors; Aluminum (Al-induced neurotoxicity or neurodegeneration)           | [117,118] |
|        |   | <i>Cotesia glomerata</i><br><i>Cotesia rubecula</i> | —                                                                            | Long-term memory formation                                                                                            | [119]     |
|        |   | <i>Apis mellifera</i>                               | —                                                                            | Neuronal and behavioral plasticity                                                                                    | [120,121] |
|        |   | <i>Antheraea pernyi</i>                             | —                                                                            | Identification and function of CREB                                                                                   | [122]     |
| dCREB2 | B | <i>Drosophila melanogaster</i>                      | —                                                                            | Circadian rhythm; formation of long-term memory                                                                       | [114–116] |
| CrebA  | B | <i>Drosophila melanogaster</i>                      | SPCGs                                                                        | Embryonic SG development                                                                                              | [123]     |
|        |   | <i>Drosophila melanogaster</i>                      | —                                                                            | Secretory capacity and activity in salivary glands                                                                    | [123,124] |
|        |   | <i>Drosophila melanogaster</i>                      | —                                                                            | Nervous system development                                                                                            | [125]     |

|             |   |                                |                                  |                                                                         |               |
|-------------|---|--------------------------------|----------------------------------|-------------------------------------------------------------------------|---------------|
| CYC         | B | <i>Nilaparvata lugens</i>      | P450 genes                       | The susceptibility to imidacloprid                                      | [126]         |
| CYC, CLK    | B | <i>Drosophila melanogaster</i> | <i>per, tim, vri, Pdp1ε, cwo</i> | Circadian rhythm                                                        | [127–130]     |
|             |   | <i>Pyrrhocoris apterus</i>     | <i>Pdp1<sub>iso1</sub>, cry2</i> | Adult diapause regulation                                               | [131]         |
| Cwo         | B | <i>Drosophila melanogaster</i> | itself and other clock genes     | Circadian rhythm                                                        | [132]         |
| Da          | B | <i>Drosophila melanogaster</i> | —                                | Photoreceptor cell determination; eye morphogenesis; cell proliferation | [133,134]     |
| Dac         | A | <i>Drosophila melanogaster</i> | —                                | Neuronal specification                                                  | [135]         |
| Deaf1, lola | C | <i>Anopheles gambiae</i>       | —                                | Immune response                                                         | [136]         |
| Dei         | B | <i>Drosophila melanogaster</i> | Muscle creatine kinase           | Epidermal cells differentiate into muscle attachment sites              | [137]         |
|             |   |                                | <i>βPS integrin</i>              | Wing development                                                        | [138]         |
| Dichaete    | D | <i>Drosophila melanogaster</i> | <i>commisureless, ase</i>        | Nervous system development                                              | [139]         |
| Dif         | D | <i>Drosophila melanogaster</i> | AMPs                             | Immune response                                                         | [140,141]     |
| Dimm        | B | <i>Drosophila melanogaster</i> | —                                | Molecular and cellular properties of all major neuroendocrine cells     | [112,142–146] |
|             |   |                                | —                                | Protection against Gram-negative infection                              | [147]         |
|             |   | <i>Bombyx mori</i>             | <i>fibH</i>                      | Silk protein synthesis                                                  | [148,149]     |
| Dfd, Lab    | A | <i>Drosophila melanogaster</i> | —                                | Embryonic development                                                   | [150]         |
| Dip3        | D | <i>Drosophila melanogaster</i> | AMPs                             | Immune response                                                         | [151]         |
| Dl          | D | <i>Drosophila melanogaster</i> | —                                | Embryonic axis establishment                                            | [35,152]      |
|             |   | <i>Manduca sexta</i>           | AMPs                             | Immune response                                                         | [153]         |
| Dm          |   | <i>Drosophila melanogaster</i> | <i>Sxl</i>                       | Sex determination                                                       | [154]         |
| Dnato3      | B | <i>Drosophila melanogaster</i> | —                                | Nervous system development                                              | [155]         |
| Dpn         | B | <i>Drosophila melanogaster</i> | <i>Sxl</i>                       | Sex determination                                                       | [156,157]     |
|             |   |                                | <i>erm</i>                       | Nervous system development                                              | [158–160]     |

|     |   |                                                         |                                                           |                                                                                                                      |           |
|-----|---|---------------------------------------------------------|-----------------------------------------------------------|----------------------------------------------------------------------------------------------------------------------|-----------|
|     |   |                                                         | —                                                         | Mitotic activity during optic lobe development                                                                       | [161]     |
|     |   |                                                         | —                                                         | R7 specification during eye development                                                                              | [162]     |
| Dsx | C | <i>Aedes aegypti</i>                                    | —                                                         | Multiple sex-specific morphological, physiological, and behavioral traits of adult females; the olfactory phenotypes | [163]     |
|     |   | <i>Antheraea assama</i><br><i>Antheraea mylitta</i>     | —                                                         | Female sexual differentiation                                                                                        | [164]     |
|     |   | <i>Apis mellifera</i>                                   | —                                                         | Reproductive division of labor                                                                                       | [165]     |
|     |   | <i>Bombyx mori</i>                                      | —                                                         | Sex determination; sexually dimorphic traits                                                                         | [166–168] |
|     |   | <i>Cyclommatus metallifer</i>                           | —                                                         | sex-specific mandible growth                                                                                         | [169]     |
|     |   | <i>Drosophila melanogaster</i>                          | <i>yolk protein genes;</i><br><i>bab1/2; desaturase-F</i> | Reproduction; sexually dimorphic traits; sex determination                                                           | [170–174] |
|     |   | <i>Drosophila immigrans</i><br>species group            | —                                                         | The origin and diversification of male sexual ornaments                                                              | [175]     |
|     |   | <i>Nilaparvata lugens</i>                               | —                                                         | Male BPH somatic development and mating behavior                                                                     | [176]     |
|     |   | <i>Onthophagus taurus</i>                               | —                                                         | Sexual dimorphism                                                                                                    | [177]     |
|     |   | <i>Ostrinia scapulalis</i>                              | —                                                         | Sex determination                                                                                                    | [178]     |
|     |   | <i>Sciara</i>                                           | —                                                         | Sex determination                                                                                                    | [179]     |
|     |   | <i>Spodoptera litura</i>                                | —                                                         | Testis development and the formation and function of external genitalia                                              | [180]     |
|     |   | <i>Tribolium castaneum</i><br><i>Onthophagus taurus</i> | Multiple potential Dsx targets                            | Sexual dimorphism                                                                                                    | [174]     |
|     |   | <i>Tribolium castaneum</i>                              | Vitellogenins,<br>Vitellogenin receptors                  | Reproduction                                                                                                         | [181]     |

|                  |   |                                |                                                                                                                       |                                                                           |           |
|------------------|---|--------------------------------|-----------------------------------------------------------------------------------------------------------------------|---------------------------------------------------------------------------|-----------|
|                  |   | <i>Trypoxylus dichotomus</i>   | —                                                                                                                     | Sexual dimorphism                                                         | [182,183] |
| Dys              | B | <i>Drosophila melanogaster</i> | —                                                                                                                     | Tracheal migration; dhesion and fusion; leg development                   | [184–187] |
| E2F4             | A | <i>Antheraea pernyi</i>        | —                                                                                                                     | Immune response                                                           | [188]     |
| E74              | C | <i>Bombyx mori</i>             | Atg genes                                                                                                             | Autophagy in the fat body                                                 | [189]     |
| E74A             | C | <i>Bombyx mori</i>             | <i>EO</i>                                                                                                             | Ecdysone degradation                                                      | [190]     |
|                  |   | <i>Bradysia hygida</i>         | <i>BhC4-1</i>                                                                                                         | Ecdysone signaling                                                        | [191]     |
| E74B             | C | <i>Aedes aegypti</i>           | <i>vitellogenin</i>                                                                                                   | Vitellogenesis                                                            | [192]     |
| E75              | C | <i>Bombyx mori</i>             | E75A, B and C repress <i>HR3</i> ; E75A and E75C directly induce Halloween genes; E75B down-regulates Halloween genes | Ecdysteroidogenesis                                                       | [193]     |
|                  |   | <i>Aedes aegypti</i>           | <i>vitellogenin</i>                                                                                                   | Vitellogenesis                                                            | [53–56]   |
|                  |   | <i>Thermobia domestica</i>     | —                                                                                                                     | Circadian clock; ecdysis                                                  | [194]     |
|                  |   | <i>Drosophila melanogaster</i> | <i>period</i>                                                                                                         | Circadian clock                                                           | [195]     |
| E75A             | C | <i>Drosophila melanogaster</i> | <i>Eip63F-1</i>                                                                                                       | Salivary gland development                                                | [196]     |
|                  |   | <i>Manduca sexta</i>           | <i>MHR3</i>                                                                                                           | Ecdysone signaling                                                        | [197]     |
| E75B             | C | <i>Manduca sexta</i>           | <i>ddc</i>                                                                                                            | Molting                                                                   | [198]     |
|                  |   | <i>Plodia interpunctella</i>   | —                                                                                                                     | Differentiation of imaginal wing cells                                    | [199]     |
| E93              | C | <i>Bombyx mori</i>             | —                                                                                                                     | Larval-pupal metamorphosis                                                | [200]     |
| E93, Br-C, Kr-h1 | C | <i>Xenos vesparum</i>          | —                                                                                                                     | Female neoteny                                                            | [201]     |
| EcR              | C | <i>Bombyx mori</i>             | —                                                                                                                     | Programmed cell death in the anterior silk glands; silk protein synthesis | [202,203] |



|               |   |                                |                                    |                                                                |               |
|---------------|---|--------------------------------|------------------------------------|----------------------------------------------------------------|---------------|
|               |   | <i>Bicyclus anynana</i>        | —                                  | Variation in wing eyespot patterns                             | [204]         |
|               |   | <i>Drosophila melanogaster</i> | <i>Kr-h1</i>                       | Photoreceptor maturation                                       | [205]         |
| EcR, USP      | C | <i>Drosophila melanogaster</i> | —                                  | 20E signaling pathway                                          | [206]         |
|               |   | <i>Schistocerca gregaria</i>   | —                                  | Metamorphosis and development                                  | [207]         |
| EcR-B1        | C | <i>Plodia interpunctella</i>   | —                                  | Differentiation of imaginal wing cells                         | [199]         |
| Emc           | B | <i>Drosophila melanogaster</i> | <i>string</i>                      | Cell cycle and dorsal-ventral patterning of the imaginal discs | [134,208,209] |
|               |   | <i>Bombyx mori</i>             | —                                  | Blastokinesis                                                  | [210]         |
| Ems           | A | <i>Drosophila melanogaster</i> | —                                  | Embryonic and olfactory sense organ development                | [211]         |
| En, Nej       | A | <i>Drosophila melanogaster</i> | <i>dpp</i>                         | Ovarian stem cell niche                                        | [212]         |
| Erm           | C | <i>Drosophila melanogaster</i> | —                                  | Nervous system development                                     | [160,213,214] |
| ERR, EcR, Usp | C | <i>Bombyx mori</i>             | <i>vitellogenin</i>                | Reproduction                                                   | [215]         |
| ERR, EcR      | C | <i>Teleogryllus emma</i>       | —                                  | Maintenance of the function of adult cricket testis            | [216]         |
| Ets           | A | <i>Bombyx mori</i>             | <i>lebocin</i>                     | Immune response                                                | [71]          |
| Eve           | A | <i>Bombyx mori</i>             | —                                  | Embryo segmentation                                            | [217]         |
| Eya           | D | <i>Drosophila melanogaster</i> | —                                  | Neuronal specification                                         | [135]         |
| Fer1          | B | <i>Drosophila melanogaster</i> | odorant receptor                   | Odor identification                                            | [218]         |
| Fer2          | B | <i>Drosophila melanogaster</i> | —                                  | Nervous system development; locomotor rhythms regulation       | [219]         |
| Fkh           | A | <i>Drosophila melanogaster</i> | <i>Dipt, Mtk</i>                   | Immune response                                                | [220]         |
|               |   |                                | autoregulation, <i>CrebA, Sage</i> | Salivary gland development                                     | [123,221–223] |
|               |   |                                | <i>reaper, hid, sens</i>           | Maintenance of SG cells survival                               | [196,224,225] |

|         |   |                                                         |                                                             |                                                                      |           |
|---------|---|---------------------------------------------------------|-------------------------------------------------------------|----------------------------------------------------------------------|-----------|
|         |   |                                                         | <i>PH4αSG2, PH4αSG1</i>                                     | Maintenance of a uniform and patent SG lumen                         | [222]     |
|         |   |                                                         | <i>Sgs4</i>                                                 | Larval SG development                                                | [226,227] |
|         |   |                                                         | <i>Eip63F-1</i>                                             | Ca <sup>2+</sup> -signaling and secretion in SG and Malpighian tubes | [228]     |
|         |   |                                                         | <i>CG6770, cabut</i>                                        | Growth inhibition                                                    | [229]     |
|         |   |                                                         | SPCGs                                                       | Secretory activity in salivary glands and epidermis                  | [123]     |
|         |   | <i>Bombyx mori</i>                                      | <i>fibH</i>                                                 | Silk protein synthesis                                               | [230]     |
|         |   |                                                         | <i>fibL, P25, sericin-1</i>                                 | Silk protein synthesis                                               | [231–233] |
|         |   | <i>Manduca sexta</i>                                    | <i>moricin, lysozyme, defensin-1, defensin-3, attacin-2</i> | Immune response                                                      | [234]     |
| FoxA    | A | <i>Helicoverpa armigera</i>                             | <i>DH-PBAN</i>                                              | Diapause                                                             | [235]     |
|         |   | <i>Helicoverpa armigera</i><br><i>Spodoptera litura</i> | <i>ABCC2, ABCC3</i>                                         | Cry1Ac toxin resistance                                              | [236]     |
| FoxL1   | A | <i>Drosophila melanogaster</i>                          | <i>Sema2a</i>                                               | SG positioning in embryos                                            | [237]     |
| FoxL2   | A | <i>Nilaparvata lugens</i>                               | <i>Fcp3C</i>                                                | Choriogenesis                                                        | [238]     |
| FOXO    | A | <i>Drosophila melanogaster</i>                          | <i>lipase 4, brummer</i>                                    | Lipid metabolism                                                     | [239,240] |
|         |   |                                                         | <i>Drs</i>                                                  | Immune response                                                      | [241]     |
|         |   |                                                         | —                                                           | Ecdysone biosynthesis                                                | [242]     |
|         |   | <i>Bombyx mori</i>                                      | <i>brummer, acid lipase-1</i>                               | Lipolysis                                                            | [243]     |
|         |   |                                                         | <i>JHE, JHEH, JHDK</i>                                      | JH degradation                                                       | [244]     |
|         |   | <i>Glossina morsitans</i>                               | —                                                           | Lipolysis suppression                                                | [245]     |
| βFtz-F1 | C | <i>Blattella germanica</i>                              | —                                                           | JH biosynthesis                                                      | [246]     |
|         |   | <i>Drosophila melanogaster</i>                          | —                                                           | JH signaling                                                         | [247]     |

|              |   |                                |                                                |                                                                 |                |
|--------------|---|--------------------------------|------------------------------------------------|-----------------------------------------------------------------|----------------|
|              |   |                                | <i>phm, dib, sad</i>                           | Ecdysteroidogenesis                                             | [248,249]      |
|              |   |                                | <i>EDG84A, EDG78E</i>                          | Pupal cuticle protein synthesis                                 | [250–252]      |
|              |   |                                | <i>MMP2</i>                                    | Fat body remodeling                                             | [253]          |
|              |   | <i>Bombyx mori</i>             | <i>BmWCP5, BmWCP4, CPR55</i>                   | Cuticle protein synthesis                                       | [66,67,70,254] |
|              |   |                                | <i>BmACP-6.7</i>                               | Formation of adult epidermis                                    | [255]          |
|              |   |                                | Atg genes                                      | Autophagy in the fat body                                       | [189]          |
|              |   |                                | <i>fibH</i>                                    | Silk protein synthesis                                          | [256]          |
|              |   | <i>Aedes aegypti</i>           | <i>vitellogenin</i>                            | Vitellogenesis                                                  | [257]          |
| FTZ          | A | <i>Drosophila melanogaster</i> | <i>slp1, wg, en</i>                            | Embryonic axis establishment                                    | [258,259]      |
| GATA $\beta$ | C | <i>Bombyx mori</i>             | late chorion genes                             | Choriogenesis                                                   | [36,260,261]   |
| GATA-1       | C | <i>Manduca sexta</i>           | <i>moricin</i>                                 | Immune response                                                 | [262]          |
| Gce          | B | <i>Drosophila melanogaster</i> | —                                              | A cofactor of Met                                               | [263]          |
| Gt           | B | <i>Drosophila melanogaster</i> | <i>kr, hb, eve</i>                             | Embryonic development                                           | [264]          |
| Hand         | B | <i>Drosophila melanogaster</i> | —                                              | Cardiogenesis; hematopoiesis; wing heart and muscle formation   | [265–268]      |
| H, Gro       | B | <i>Aedes aegypti</i>           | 15% of Met-repressed genes                     | Reproduction                                                    | [269]          |
| Hb           | A | <i>Bombyx mori</i>             | —                                              | Embryo development                                              | [270]          |
|              |   |                                | —                                              | NB cell fate decision                                           | [271]          |
|              |   | <i>Drosophila melanogaster</i> | <i>rhomboid, Star, CBP, Fasciclin2, sprout</i> | Retinal glia cell development and blood-brain barrier integrity | [272]          |
| HNF4         | C | <i>Aedes aegypti</i>           | —                                              | Lipid metabolism                                                | [273]          |
| bHLH54F      | B | <i>Drosophila melanogaster</i> | —                                              | Expressed in the precursor of longitudinal visceral muscle      | [274]          |
| Hinge 1/2/3  | D | <i>Drosophila melanogaster</i> | —                                              | Wing hinge formation                                            | [275]          |

|                            |   |                                |                          |                                                                     |               |
|----------------------------|---|--------------------------------|--------------------------|---------------------------------------------------------------------|---------------|
| DHR3                       | C | <i>Drosophila melanogaster</i> | <i>EDG84A</i>            | Pupal cuticle protein synthesis                                     | [250,252]     |
|                            |   |                                | <i>EcR, E74B, βFTZ-1</i> | Metamorphosis                                                       | [276]         |
|                            |   |                                | <i>phm, dib, sad</i>     | Ecdysteroidogenesis                                                 | [249]         |
| HR3                        | C | <i>Aedes aegypti</i>           | <i>SCP-2</i>             | Energy metabolism                                                   | [257]         |
|                            |   |                                | <i>vitellogenin</i>      | Vitellogenesis                                                      | [53–56]       |
|                            |   | <i>Bombyx mori</i>             | Atg genes                | Autophagy in the fat body                                           | [189]         |
|                            |   | <i>Manduca sexta</i>           | <i>MHR3</i>              | Ecdysone signaling                                                  | [197]         |
|                            |   | <i>Plodia interpunctella</i>   | —                        | Differentiation of imaginal wing cells                              | [199]         |
| <i>Thermobia domestica</i> | — | Circadian clock; ecdysis       | [194]                    |                                                                     |               |
| DHR4                       | C | <i>Drosophila melanogaster</i> | <i>Cyp6t3</i>            | Repress ecdysteroidogenesis                                         | [277]         |
| HR4                        | C | <i>Manduca sexta</i>           | <i>ddc</i>               | Molting                                                             | [198]         |
| HR38                       | C | <i>Bombyx mori</i>             | —                        | The effect of PTH on HR38 expression                                | [278]         |
| DHR39                      | C | <i>Drosophila melanogaster</i> | <i>EDG84A</i>            | Pupal cuticle protein synthesis                                     | [250,252]     |
| DHR96                      | C | <i>Drosophila melanogaster</i> | Many PB-regulated genes  | PB tolerance and DDT resistance                                     | [279]         |
| HSF                        | A | <i>Drosophila melanogaster</i> | Heat shock genes         | Heat stress                                                         | [280,281]     |
|                            |   | <i>Bombyx mori</i>             | —                        | Activation of <i>Hsp70a</i> and <i>Samui</i> under 5 °C -incubation | [282]         |
| Hth                        | A | <i>Drosophila melanogaster</i> | —                        | Development of the wing imaginal disc                               | [283,284]     |
| ILF                        | C | <i>Bombyx mori</i>             | <i>POUM2</i>             | Metamorphosis                                                       | [285]         |
| Keap1                      | D | <i>Bombyx mori</i>             | —                        | Response after phoxim and phoxim treatment                          | [104,105]     |
| Kni                        | C | <i>Drosophila melanogaster</i> | <i>Phm, Dib</i>          | Ecdysteroidogenesis                                                 | [286]         |
| Kr                         | C | <i>Drosophila melanogaster</i> | <i>Rh5, Rh6</i>          | Photoreceptor neuron differentiation                                | [287]         |
| Kr-h1                      | C | <i>Bombyx mori</i>             | <i>Br-C, E93</i>         | Metamorphosis                                                       | [288,289]     |
| Kr-h1                      | C | <i>Drosophila melanogaster</i> | Steroidogenic enzymes    | Ecdysone biosynthesis; metabolic homeostasis; metamorphosis         | [240,290,291] |

|             |   |                                  |                                         |                                                                     |                  |
|-------------|---|----------------------------------|-----------------------------------------|---------------------------------------------------------------------|------------------|
|             |   | <i>Locusta migratoria</i>        | <i>vitellogenin</i>                     | Vitellogenesis and oocyte maturation                                | [292]            |
|             |   | <i>Nilaparvata lugens</i>        | —                                       | Ovary development                                                   | [59]             |
|             |   | <i>Tribolium castaneum</i>       | E93                                     | Metamorphosis                                                       | [290,293]        |
|             |   | <i>Blattella germanica</i>       |                                         |                                                                     |                  |
|             |   | <i>Pyrrhocoris apterus</i>       | <i>vitellogenin</i>                     | Vitellogenesis                                                      | [294]            |
| LL3         | D | <i>Anopheles gambiae</i>         | SPRN6                                   | Anti-Plasmodium immunity                                            | [295]            |
| <i>l'sc</i> | B | <i>Drosophila melanogaster</i>   | —                                       | Muscle progenitors                                                  | [296]            |
| Lolal       | D | <i>Drosophila melanogaster</i>   | <i>crumbs, Moesin</i>                   | SG and trache elongation                                            | [297]            |
| Islet, Lim3 | A | <i>Drosophila melanogaster</i>   | —                                       | Motoneuron identity                                                 | [298]            |
| Max         | B | <i>Drosophila melanogaster</i>   | —                                       | Regulation of Myc activity                                          | [299]            |
| MBF2        | D | <i>Bombyx mori</i>               | <i>fibH</i>                             | Silk protein synthesis                                              | [149]            |
| Met         | B | <i>Bombyx mori</i>               | <i>Kr-h1</i>                            | Metamorphosis                                                       | [300,301]        |
|             |   | <i>Cimex lectularius</i>         | <i>vitellogenin</i>                     | Vitellogenesis and ovigenesis                                       | [302]            |
|             |   | <i>Drosophila melanogaster</i>   | <i>Dronc, Drice</i>                     | Programmed cell death                                               | [303]            |
|             |   | <i>Glossina morsitans</i>        | —                                       | Lipolysis suppression                                               | [245]            |
|             |   | <i>Leptinotarsa decemlineata</i> | —                                       | Growth and development                                              | [304,305]        |
|             |   | <i>Locusta migratoria</i>        | <i>vitellogenin</i>                     | Vitellogenesis and oocyte maturation                                | [292]            |
|             |   |                                  | <i>Mcm4, Mcm7</i>                       | Polyploidy and vitellogenesis                                       | [306]            |
|             |   |                                  | <i>Cdc6, Grp78-2</i>                    | Fat body cell homeostasis, polyploidy, vitellogenesis and oogenesis | [307,308]        |
|             |   | <i>Pyrrhocoris apterus</i>       | <i>vitellogenin</i>                     | Vitellogenesis                                                      | [294]            |
|             |   |                                  | Accessory gland proteins and hexamerins | Male reproduction                                                   | [309]            |
|             |   |                                  | <i>Pdp1<sup>iso1</sup>, cry2</i>        | Adult diapause regulation                                           | [131]            |
|             |   | <i>Tribolium castaneum</i>       | <i>Kr-h1, Br-C</i>                      | Metamorphosis                                                       | [60,290,310–314] |

|                                           |   |                                                                                             |                                                      |                                                                              |               |
|-------------------------------------------|---|---------------------------------------------------------------------------------------------|------------------------------------------------------|------------------------------------------------------------------------------|---------------|
| Met, SRC                                  | B | <i>Aedes aegypti</i>                                                                        | <i>Kr-h1;RRS1</i> ; six ribosomal protein; <i>ET</i> | Reproduction                                                                 | [315–318]     |
| Met, CYC, SRC                             | B | <i>Aedes aegypti</i>                                                                        | <i>Kr-h1, Hairy</i>                                  | Light-dependent circadian regulation                                         | [319]         |
| MIC                                       | D | <i>Bombyx mori</i>                                                                          | <i>sericin-1</i>                                     | Silk protein synthesis                                                       | [320–322]     |
| Mid                                       | D | <i>Drosophila melanogaster</i>                                                              | <i>wingless, hedgehog</i>                            | Wing disc development                                                        | [323]         |
|                                           |   |                                                                                             | <i>gooseberry</i>                                    | Neuroblast development                                                       | [324]         |
| Mitf                                      | B | <i>Drosophila melanogaster</i>                                                              | —                                                    | Eye development                                                              | [325]         |
|                                           |   |                                                                                             | V-ATPase                                             | Lysosomal-autophagy pathway                                                  | [326]         |
| Mld                                       | C | <i>Drosophila melanogaster</i>                                                              | <i>spok</i>                                          | Ecdysteroidogenesis                                                          | [286,327–329] |
| Mlx, Mondo                                | B | <i>Drosophila melanogaster</i>                                                              | <i>Cabut, Aldh-III</i>                               | Dietary sugar tolerance                                                      | [330]         |
| Mnt                                       | B | <i>Drosophila melanogaster</i>                                                              | —                                                    | Body size regulation                                                         | [331]         |
| dMyd                                      | B | <i>Drosophila melanogaster</i>                                                              | —                                                    | A transiently expressed muscle marker                                        | [332]         |
| Nej, Tgo                                  | B | <i>Drosophila melanogaster</i>                                                              | —                                                    | Peripheral glial differentiation                                             | [333]         |
| Nkx-2.5-like, transcription factor 3-like | A | <i>Apis mellifera</i>                                                                       | Unknown                                              | Fipronil resistance                                                          | [334]         |
| Odd                                       | C | <i>Drosophila melanogaster</i>                                                              | —                                                    | Embryonic axis establishment                                                 | [335]         |
|                                           |   | <i>Bombyx mori</i>                                                                          | —                                                    | Embryo segmentation                                                          | [217]         |
| Oli                                       | B | <i>Drosophila melanogaster</i>                                                              | —                                                    | Nervous system development; larval and adult locomotion; neuronal remodeling | [336,337]     |
| Otd                                       | A | <i>Drosophila melanogaster</i>                                                              | <i>kr-h1</i>                                         | Photoreceptor maturation                                                     | [205]         |
|                                           |   | <i>Bombyx mori</i>                                                                          | <i>eve</i>                                           | Embryo body segmentation                                                     | [80]          |
|                                           |   | <i>Onthophagus binodis</i><br><i>Digitonthophagus gazella</i><br><i>Liatongus militaris</i> | —                                                    | Development of functional ectopic compound eyes                              | [338]         |

|            |                     |                                |                                      |                                                                                                                                                                  |           |
|------------|---------------------|--------------------------------|--------------------------------------|------------------------------------------------------------------------------------------------------------------------------------------------------------------|-----------|
| Pb         | A                   | <i>Drosophila melanogaster</i> | —                                    | Embryonic axis establishment                                                                                                                                     | [339]     |
| Pdm1, Pdm2 | A                   | <i>Drosophila melanogaster</i> | <i>CecA1</i>                         | Immune response                                                                                                                                                  | [340]     |
| Pdp1       | B                   | <i>Drosophila melanogaster</i> | —                                    | Regulation of somatic muscle gene expression                                                                                                                     | [341]     |
| Pdp1ε      | B                   | <i>Drosophila melanogaster</i> | —                                    | Circadian rhythm                                                                                                                                                 | [130]     |
| Pdp1γ      | B                   | <i>Drosophila melanogaster</i> | —                                    | Pphysiological and drug-influenced lipid regulation                                                                                                              | [342]     |
| Pitx       | A                   | <i>Bombyx mori</i>             | <i>DH-PBAN, PTTH</i>                 | Neuroendocrine system activation                                                                                                                                 | [343,344] |
| PntP1      | A                   | <i>Drosophila melanogaster</i> | <i>Ase, erm, Pros</i>                | Nervous system development                                                                                                                                       | [345,346] |
| POU-M1     | A                   | <i>Bombyx mori</i>             | <i>sericin-1</i>                     | Silk protein synthesis                                                                                                                                           | [321,347] |
| Prd        | A                   | <i>Drosophila melanogaster</i> | <i>EcR</i>                           | The function of male accessory glands and fertility                                                                                                              | [348]     |
| Prey2      | D                   | <i>Helicoverpa armigera</i>    | <i>CYP6B6</i>                        | Response to plant secondary toxicant 2-tridecanone                                                                                                               | [349]     |
| Vri        | B                   | <i>Drosophila melanogaster</i> | —                                    | A dominant enhancer of Dpp signaling in embryonic D-V patterning and wings; cardiac aging; hair and cell growth; embryonic tracheal development; circadian clock | [350–353] |
|            |                     | <i>Spodoptera frugiperda</i>   | —                                    | Circadian rhythm regulation                                                                                                                                      | [354]     |
| Vvl        | A                   | <i>Drosophila melanogaster</i> | <i>CecA1, DiptA, AttA, AttB, Drs</i> | Immune response                                                                                                                                                  | [79,340]  |
|            |                     |                                | <i>Phm, Dib</i>                      | Ecdysteroidogenesis                                                                                                                                              | [286]     |
|            |                     |                                | —                                    | Motoneuron identity                                                                                                                                              | [298]     |
|            |                     | <i>Bombyx mori</i>             | <i>vitellogenin</i>                  | Reproduction                                                                                                                                                     | [64]      |
|            |                     |                                | <i>fibH</i>                          | Silk synthesis                                                                                                                                                   | [355]     |
| <i>Phm</i> | Ecdysteroidogenesis | [356]                          |                                      |                                                                                                                                                                  |           |

|                   |   |                                |                                            |                                                                                                |               |
|-------------------|---|--------------------------------|--------------------------------------------|------------------------------------------------------------------------------------------------|---------------|
|                   |   |                                | <i>DH-PBAN</i>                             | Diapause                                                                                       | [357]         |
|                   |   |                                | <i>BmWCP4</i>                              | Cuticle protein synthesis                                                                      | [1,2]         |
|                   |   | <i>Tribolium castaneum</i>     | <i>jhamt3, HR3, Phm, Spo</i>               | JH biosynthesis and ecdysteroidogenesis                                                        | [358]         |
|                   |   | <i>Helicoverpa armigera</i>    | <i>DH-PBAN, PTEN</i>                       | Diapause                                                                                       | [359,360]     |
| Rel               | D | <i>Drosophila melanogaster</i> | —                                          | Immune response                                                                                | [141,361,362] |
|                   |   | <i>Helicoverpa armigera</i>    | <i>cathepsin L</i>                         | Fat body dissociation                                                                          | [363]         |
| Rel2              | D | <i>Manduca sexta</i>           | AMPs                                       | Immune response                                                                                | [153]         |
| REL2              | D | <i>Anopheles gambiae</i>       | AMPs                                       | Immune response                                                                                | [364]         |
| REL1-A,<br>REL1-B | D | <i>Aedes aegypti</i>           | <i>Dipt, Drs,</i>                          | Antifungal immune responses                                                                    | [365]         |
| REL2              | D | <i>Aedes aegypti</i>           | <i>Defensins A, C, D<br/>Cec A, Cec N</i>  | Defense against Gram-positive,<br>Gram-negative bacteria and <i>Plasmodium<br/>gallinaceum</i> | [366–368]     |
| Rel2              | D | <i>Culex quinquefasciatus</i>  | <i>Vago</i>                                | Anti-viral responses                                                                           | [369]         |
| RelA, RelB        | D | <i>Bombyx mori</i>             | <i>Lebocin4, Attacin</i>                   | Immune response                                                                                | [370]         |
| Rel1, Rel2        | D | <i>Bombyx mori</i>             | <i>Cecropin B1, Attacin,<br/>Lebocin 4</i> | Immune response                                                                                | [371]         |
| RelA              | D | <i>Allomyrina dichotoma</i>    | <i>Coleoptericin A</i>                     | Immune response                                                                                | [372]         |
| Rib               | A | <i>Drosophila melanogaster</i> | <i>crumbs, Moesin,</i>                     | SG and trache elongation                                                                       | [297]         |
|                   |   |                                | Autoregulation                             | Embryonic SG morphogenesis                                                                     | [373]         |
| Run               | D | <i>Drosophila melanogaster</i> | <i>Slx</i>                                 | Sex determination                                                                              | [374]         |
|                   |   |                                | <i>engrailed, slp1</i>                     | Embryonic development                                                                          | [258,259]     |
|                   |   | <i>Bombyx mori</i>             | —                                          | Embryo segmentation                                                                            | [217]         |
| Sage              | B | <i>Bombyx mori</i>             | <i>fibH</i>                                | Silk protein synthesis                                                                         | [148,230]     |
|                   |   | <i>Drosophila melanogaster</i> | Sage target genes                          | Salivary gland development                                                                     | [223]         |
|                   |   |                                | <i>PH4αSG2, PH4αSG1</i>                    | Maintenance of a uniform and patent SG                                                         | [222]         |



|                 |   |                                |                              |                                                  |                |
|-----------------|---|--------------------------------|------------------------------|--------------------------------------------------|----------------|
|                 |   |                                |                              | lumen                                            |                |
| Sal             | C | <i>Pieris rapae</i>            | —                            | Wing pattern development                         | [375]          |
| Sal, E75        | C | <i>Papilio Xuthus</i>          | —                            | Larval eyespot markings                          | [376]          |
| Sc (Sis-B)      | B | <i>Drosophila melanogaster</i> | <i>Sxl</i>                   | Sex determination                                | [377]          |
| Scr             | C | <i>Drosophila melanogaster</i> | <i>Fkh, CrebA, Sage, Hkb</i> | Salivary gland specification                     | [378–381]      |
|                 |   | <i>Bombyx mori</i>             | —                            | Development of the embryonic silk gland          | [382]          |
| Séan, Ouib, Mld | C | <i>Drosophila melanogaster</i> | <i>nvd, spok</i>             | Ecdysteroidogenesis                              | [329]          |
| Sens            | C | <i>Drosophila melanogaster</i> | <i>reaper, hid</i>           | Maintenance of salivary gland cells survival     | [225]          |
| SGF 1/2/3/4     | D | <i>Bombyx mori</i>             | —                            | Silk protein synthesis                           | [231,383]      |
| Sim, Tgo        | B | <i>Drosophila melanogaster</i> | —                            | CNS midline cell development                     | [384,385]      |
| Sima, Tgo       | B | <i>Drosophila melanogaster</i> | —                            | Normal development and hypoxia response          | [386,387]      |
| Sis-A           | B | <i>Drosophila melanogaster</i> | <i>Sxl</i>                   | Sex determination                                | [388]          |
|                 |   |                                | —                            | Midgut formation; Brahma complex recruitment     | [389]<br>[390] |
| slp1            | A | <i>Drosophila melanogaster</i> | —                            | Embryonic axis establishment                     | [259]          |
| Sna, Esg, Wor   | C | <i>Drosophila melanogaster</i> | —                            | Asymmetric cell division of embryonic NBs        | [391–393]      |
| Nine Sox genes  | D | <i>Bombyx mori</i>             | —                            | Identification and characterization of Sox genes | [394]          |
| SRAM            | D | <i>Sarcophaga peregrina</i>    | <i>lectin</i>                | Immune response                                  | [395]          |
| dSREBP          | B | <i>Drosophila melanogaster</i> | —                            | Lipid synthesis                                  | [396]          |

|          |   |                                |                  |                                                                                          |               |
|----------|---|--------------------------------|------------------|------------------------------------------------------------------------------------------|---------------|
|          |   |                                | —                | Nervous system development                                                               | [397]         |
| SRC      | B | <i>Cimex lectularius</i>       | —                | Reproduction                                                                             | [398]         |
|          |   | <i>Aedes aegypti</i>           | —                | Reproduction                                                                             | [315,316,318] |
|          |   | <i>Locusta migratoria</i>      | —                | Reproduction                                                                             | [292,306–308] |
|          |   | <i>Pyrrhocoris apterus</i>     | —                | Reproduction                                                                             | [294,309]     |
|          |   | <i>Bombyx mori</i>             | —                | Metamorphosis                                                                            | [300,301]     |
|          |   | <i>Tribolium castaneum</i>     | —                | Metamorphosis                                                                            | [313,314]     |
| Ss       | B | <i>Drosophila melanogaster</i> | —                | Nervous system development                                                               | [186]         |
|          |   |                                | —                | Distal antenna formation                                                                 | [399]         |
| STAT     | D | <i>Drosophila melanogaster</i> | <i>Raf</i>       | Immune response                                                                          | [400]         |
| STAT-A   | D | <i>Anopheles gambiae</i>       | <i>NOS, SOCS</i> | Immune response                                                                          | [401]         |
| STAT-B   | D | <i>Anopheles gambiae</i>       | <i>STAT-A</i>    | Immune response                                                                          | [401]         |
| Svp      | C | <i>Blattella germanica</i>     | —                | JH biosynthesis                                                                          | [246]         |
|          |   | <i>Drosophila melanogaster</i> | —                | CNS and photoreceptor cell development                                                   | [402–404]     |
| Tgo      | B | <i>Drosophila melanogaster</i> | —                | Formation of CNS midline antennal and tarsal development peripheral glial cell migration | [405–408]     |
| Tim      | B | <i>Laodelphax striatellus</i>  | —                | The circadian behavioral rhythms                                                         | [409]         |
| Tll      | C | <i>Drosophila melanogaster</i> | —                | Neural and embryonic development                                                         | [206,410,411] |
| Toy      | A | <i>Drosophila melanogaster</i> | <i>ey</i>        | Eye development                                                                          | [412]         |
| Trh, Tgo | C | <i>Drosophila melanogaster</i> | <i>jing</i>      | Tracheal development                                                                     | [407]         |
| Twi      | B | <i>Drosophila melanogaster</i> | —                | Cell fate decisions                                                                      | [413]         |
| Tsh      | C | <i>Drosophila melanogaster</i> | —                | Wing imaginal disc development                                                           | [283,284]     |
| Ubx      | A | <i>Bicyclus anynana</i>        | —                | Embryonic body plan and wing patterns                                                    | [17,18]       |
|          |   | <i>Drosophila melanogaster</i> | <i>dad</i>       | The differentiation of the gastric stem cell lineage                                     | [414]         |

|            |   |                                |                 |                                             |           |
|------------|---|--------------------------------|-----------------|---------------------------------------------|-----------|
|            |   | <i>Manduca sexta</i>           | —               | The expression patterns in the embryos      | [5]       |
|            |   | <i>Bombyx mori</i>             | —               | The abdominal appendage specification       | [415]     |
| USF        | B | <i>Drosophila melanogaster</i> | <i>Stellate</i> | Male fertility                              | [416]     |
| Woc        | C | <i>Drosophila melanogaster</i> | —               | Ecdysone biosynthesis                       | [417]     |
| Zld        | C | <i>Drosophila melanogaster</i> | <i>Sxl</i>      | Sex determination                           | [418]     |
|            |   |                                | <i>eve</i>      | Embryonic development                       | [419]     |
| Zfh1, Zfh2 | C | <i>Drosophila melanogaster</i> | —               | Embryonic development and immune regulation | [420,421] |

<sup>a</sup> Abbreviations of TFs in this table. **Abd-A/B**: Abdominal-A/B; **AhR**: Aryl hydrocarbon receptor; **ARNT**: Aryl hydrocarbon receptor nuclear translocator; **Antp**: Antennapedia; **Apt-like**: Apontic-like; **Ase**: Asense; **ATF-2/3**: Activating transcription factor 2/3; **Ato**: Atonal; **Bcd**: Bicoid; **Bmx**: Bigmax; **BrC**: Broad-Complex; **BrC-Z1/2/3/4**: Broad complex isoform 1/2/3/4; **Btd**: Buttonhead; **Cad**: Caudal; **Cato**: Cousin of atonal; **C/EBP**: CCAAT-enhancer-binding protein; **Cnc B/C**: Cap 'n' collar B/C; **Col**: Collier; **Crc**: Cryptocephal; **CREB**: cAMP response element binding protein; **Cyc**: Cycle; **Clk**: Clock; **Cwo**: Clockwork orange; **Da**: Daughterless; **Dac**: Dachshund; **Dei**: Delilah; **Deaf-1**: Deformed epidermal autoregulatory factor-1; **Dfd**: Deformed; **Dif**: Dorsal-related immunity factor; **Dimm**: Dimmed; **Dip3**: Dorsal interacting protein 3; **DI**: Dorsal; **Dm**: Diminutive; **Dpn**: Deadpan; **Dys**: Dysfusion; **E74/75**: Ecdysone-induced protein 74/75; **EcR**: Ecdysone receptor; **Emc**: Extramacrochaetae; **Ems**: Empty spiracles; **En**: Engrailed; **ERR**: Oestrogen-related receptor; **Esg**: Escargot; **Eve**: Even-skipped; **Eya**: Eyes absent; **Fkh**: Forkhead; **FoxA**: Forkhead box, sub-group A; **FoxL1/2**: Forkhead box transcription factor L1/2; **FOXO**: Forkhead box, sub-group O; **βFtz-F1**: β-fushi tarazu transcription factor 1; **Ftz**: Fushi tarazu; **Gce**: Germ-cell expressed; **Gro**: Groucho; **Gt**: Giant; **H**: Hairly; **Hb**: Hunchback; **HNF4**: Hepatocyte nuclear factor 4; **DHR3/4/39/96**: *Drosophila* Hormone Receptor 3/4/39/96; **HR3/4/38**: Hormone Receptor 3/4/38; **HSF**: Heat shock factor; **Hth**: Homothorax; **Kni**: Knirps; **Kr**: Krüppel; **Kr-h1**: Krüppel homolog 1; **Lab**: Labial; **LL3**: LITAF-like 3; **I<sup>sc</sup>**: lethal of scute; **Lolal**: Lola Like; **MBF2**: Multiprotein bridging factor 2; **Met**: Methoprene-tolerant; **Nej**: Nejire; **Odd**: Odd-skipped; **Oli**: Olig family; **Otd**: Orthodenticle; **Pdp1**: PAR-domain protein 1; **PntP1**: Pointed P1; **Prd**: Paired; **Vri**: Vrille; **USF**: Upstream stimulatory factor; **Vvl**: Ventral veins lacking; **Rel**: Relish; **Pb**: Proboscidea; **Rib**: Ribbon; **Run**: Runt; **Sal**: Spalt; **Sc**: Scute; **Scr**: Sex combs reduced; **Séan**: Séance; **Sens**: Senseless; **Sim**: Single-minded; **Sima**: Similar; **Sis-A/B**: Sisterless A/B; **Slp1**: Sloppy-paired 1; **Sna**: Snail; **SRAM**: Sarcophaga-derived Rel/Ankyrin molecule; **SRC**: Steroid receptor coactivator; **Ss**: Spineless; **STAT**: Signal transducers and activators of transcription; **Svp**: Seven-up; **Tgo**: Tango; **Tim**: Timeless; **Tll**: Tailless; **Toy**: Twin of eyeless; **Trh**: Tracheless; **Tw**: Twist; **Tsh**: Teashirt; **Ubx**: Ultrabithorax; **Wor**: Worniu; **Woc**: Without children; **Zld**: Zelda; **Zfh1**: Zn finger homeodomain 1.

<sup>b</sup> The structures of TF superclasses: A represents the helix-turn-helix domain factor; B represents the basic domain factor; C represents the zinc finger domain factor; D represents other DNA-binding domain factor.

<sup>c</sup> We apologize in advance to those whose work could not be adequately discussed and cited in the main body due to space limitations.

## References

1. Deng, H.; Zhang, J.; Li, Y.; Zheng, S.; Liu, L.; Huang, L.; Xu, W.H.; Palli, S.R.; Feng, Q. Homeodomain POU and Abd-A proteins regulate the transcription of pupal genes during metamorphosis of the silkworm, *Bombyx mori*. *Proc. Natl. Acad. Sci. U. S. A.* **2012**, *109*, 12598–12603.
2. He, Y.; Deng, H.; Hu, Q.; Zhu, Z.; Liu, L.; Zheng, S.; Song, Q.; Feng, Q. Identification of the binding domains and key amino acids for the interaction of the transcription factors BmPOUM2 and BmAbd-A in *Bombyx mori*. *Insect Biochem. Mol. Biol.* **2017**, *81*, 41–50.
3. Bello, B.C.; Hirth, F.; Gould, A.P. A pulse of the *Drosophila* Hox protein Abdominal-A schedules the end of neural proliferation via neuroblast apoptosis. *Neuron* **2003**, *37*, 209–219.
4. Tsuji, T.; Hasegawa, E.; Isshiki, T. Neuroblast entry into quiescence is regulated intrinsically by the combined action of spatial Hox proteins and temporal identity factors. *Development* **2008**, *135*, 3859–3869.
5. Zheng, Z.; Khoo, A.; Fambrough, D., Jr.; Garza, L.; Booker, R. Homeotic gene expression in the wild-type and a homeotic mutant of the moth *Manduca sexta*. *Dev. Genes Evol.* **1999**, *209*, 460–472.
6. Huang, Y.; Chen, Y.; Zeng, B.; Wang, Y.; James, A.A.; Gurr, G.M.; Yang, G.; Lin, X.; Huang, Y.; You, M. CRISPR/Cas9 mediated knockout of the *abdominal-A* homeotic gene in the global pest, diamondback moth (*Plutella xylostella*). *Insect Biochem. Mol. Biol.* **2016**, *75*, 98–106.
7. Bi, H.L.; Xu, J.; Tan, A.J.; Huang, Y.P. CRISPR/Cas9-mediated targeted gene mutagenesis in *Spodoptera litura*. *Insect Science* **2016**, *23*, 469–477.
8. Duan, J.; Xu, H.; Ma, S.; Guo, H.; Wang, F.; Zhang, L.; Zha, X.; Zhao, P.; Xia, Q. Ectopic expression of the male BmDSX affects formation of the chitin plate in female *Bombyx mori*. *Mol. Reprod. Dev.* **2014**, *81*, 240–247.
9. Birkholz, O.; Vef, O.; Rogulja-Ortmann, A.; Berger, C.; Technau, G.M. *Abdominal-B* and *caudal* inhibit the formation of specific neuroblasts in the *Drosophila* tail region. *Development* **2013**, *140*, 3552–3564.
10. Brown, R.P.; McDonnell, C.M.; Berenbaum, M.R.; Schuler, M.A. Regulation of an insect cytochrome P450 monooxygenase gene (*CYP6B1*) by aryl hydrocarbon and xanthotoxin response cascades. *Gene* **2005**, *358*, 39–52.
11. Peng, T.; Chen, X.; Pan, Y.; Zheng, Z.; Wei, X.; Xi, J.; Zhang, J.; Gao, X.; Shang, Q. Transcription factor *aryl hydrocarbon receptor/aryl hydrocarbon receptor nuclear translocator* is involved in regulation of the xenobiotic tolerance-related cytochrome P450 *CYP6DA2* in *Aphis gossypii* Glover. *Insect Mol. Biol.* **2017**, *26*, 485–495.
12. Petersen, R.A.; Niamsup, H.; Berenbaum, M.R.; Schuler, M.A. Transcriptional response elements in the promoter of *CYP6B1*, an insect P450 gene regulated by plant chemicals. *Biochim. Biophys. Acta* **2003**, *1619*, 269–282.
13. Petersen Brown, R.; Berenbaum, M.R.; Schuler, M.A. Transcription of a lepidopteran cytochrome P450 promoter is modulated by multiple elements in its 5' UTR and repressed by 20-hydroxyecdysone. *Insect Mol. Biol.* **2004**, *13*, 337–347.
14. zur Lage, P.I.; Prentice, D.R.; Holohan, E.E.; Jarman, A.P. The *Drosophila* proneural gene *amos* promotes olfactory sensillum formation and suppresses bristle formation. *Development* **2003**, *130*, 4683–4693.
15. Tsubota, T.; Tomita, S.; Uchino, K.; Kimoto, M.; Takiya, S.; Kajiwarra, H.; Yamazaki, T.; Sezutsu, H. A Hox Gene, *Antennapedia*, regulates expression of multiple major silk protein genes in the silkworm *Bombyx mori*. *J. Biol. Chem.* **2016**, *291*, 7087–7096.
16. Takiya, S.; Tsubota, T.; Kimoto, M. Regulation of silk genes by Hox and homeodomain proteins in the terminal differentiated silk gland of the silkworm *Bombyx mori*. *J. Dev. Biol.* **2016**, *4*,
17. Saenko, S.V.; Marialva, M.S.; Beldade, P. Involvement of the conserved Hox gene *Antennapedia* in the development and evolution of a novel trait. *EvoDevo* **2011**, *2*, 9.
18. Tong, X.; Hrycaj, S.; Podlaha, O.; Popadic, A.; Monteiro, A. Over-expression of *Ultrabithorax* alters embryonic body plan and wing patterns in the butterfly *Bicyclus anynana*. *Dev. Biol.* **2014**, *394*, 357–366.
19. Prince, F.; Katsuyama, T.; Oshima, Y.; Plaza, S.; Resendez-Perez, D.; Berry, M.; Kurata, S.; Gehring,

- W.J. The YPWM motif links Antennapedia to the basal transcriptional machinery. *Development* **2008**, *135*, 1669–1679.
20. Wong, M.M.; Liu, M.F.; Chiu, S.K. Cropped, *Drosophila* transcription factor AP-4, controls tracheal terminal branching and cell growth. *BMC Dev. Biol.* **2015**, *15*, 20.
  21. Hu, C.H.; Hong, B.; Xu, W.H. Identification of an E-box DNA binding protein, activated protein 4, and its function in regulating the expression of the gene encoding diapause hormone and pheromone biosynthesis-activating neuropeptide in *Helicoverpa armigera*. *Insect Mol. Biol.* **2010**, *19*, 243–252.
  22. Yoda, S.; Yamaguchi, J.; Mita, K.; Yamamoto, K.; Banno, Y.; Ando, T.; Daimon, T.; Fujiwara, H. The transcription factor Apontic-like controls diverse colouration pattern in caterpillars. *Nat. Commun.* **2014**, *5*, 4936.
  23. González, F.; Romani, S.; Cubas, P.; Modolell, J.; Campuzano, S. Molecular analysis of the *asense* gene, a member of the *achaete-scute* complex of *Drosophila melanogaster*, and its novel role in optic lobe development. *EMBO J.* **1989**, *8*, 3553–3562.
  24. Okamura, T.; Shimizu, H.; Nagao, T.; Ueda, R.; Ishii, S. ATF-2 regulates fat metabolism in *Drosophila*. *Mol. Biol. Cell* **2007**, *18*, 1519–1529.
  25. Peng, R.; Fu, Q.; Hong, H.; Schwaegler, T.; Lan, Q. THAP and ATF-2 regulated sterol carrier protein-2 promoter activities in the larval midgut of the yellow fever mosquito, *Aedes aegypti*. *PLoS One* **2012**, *7*, e46948.
  26. Bhat, S.; Jones, W.D. An accelerated miRNA-based screen implicates Atf-3 in *Drosophila* odorant receptor expression. *Sci. Rep.* **2016**, *6*, 20109.
  27. Sekyrova, P.; Bohmann, D.; Jindra, M.; Uhlírova, M. Interaction between *Drosophila* bZIP proteins Atf3 and Jun prevents replacement of epithelial cells during metamorphosis. *Development* **2010**, *137*, 141–150.
  28. Rynes, J.; Donohoe, C.D.; Frommolt, P.; Brodesser, S.; Jindra, M.; Uhlírova, M. Activating transcription factor 3 regulates immune and metabolic homeostasis. *Mol. Cell Biol.* **2012**, *32*, 3949–3962.
  29. Jarman, A.P.; Grau, Y.; Jan, L.Y.; Jan, Y.N. *atonal* is a proneural gene that directs chordotonal organ formation in the *Drosophila* peripheral nervous system. *Cell* **1993**, *73*, 1307–1321.
  30. Yu, L.; Zhou, Q.; Zhang, C.; Pignoni, F. Identification of *Bombyx atonal* and functional comparison with the *Drosophila atonal* proneural factor in the developing fly eye. *Genesis* **2012**, *50*, 393–403.
  31. Hu, P.; Feng, F.; Xia, H.; Chen, L.; Yao, Q.; Chen, K. Molecular cloning and characterization of a *Bombyx mori* gene encoding the transcription factor Atonal. *Z. Naturforsch C* **2014**, *69*, 155–164.
  32. Ohno, K.; Sawada, J.; Takiya, S.; Kimoto, M.; Matsumoto, A.; Tsubota, T.; Uchino, K.; Hui, C.C.; Sezutsu, H.; Handa, H., et al. Silk gland factor-2, involved in fibroin gene transcription, consists of LIM homeodomain, LIM-interacting, and single-stranded DNA-binding proteins. *J. Biol. Chem.* **2013**, *288*, 31581–31591.
  33. Kimoto, M.; Tsubota, T.; Uchino, K.; Sezutsu, H.; Takiya, S. LIM-homeodomain transcription factor Awh is a key component activating all three fibroin genes, *fibH*, *fibL* and *flx*, in the silk gland of the silkworm, *Bombyx mori*. *Insect Biochem. Mol. Biol.* **2015**, *56*, 29–35.
  34. Nasiadka, A.; Dietrich, B.H.; Krause, H.M. Anterior-posterior patterning in the *Drosophila* embryo. In *Advances in Developmental Biology and Biochemistry*, DePamphilis, M.L., Ed. Elsevier: Amsterdam, 2002; Vol. 12, pp. 155–204.
  35. Gilbert, S.F. The genetics of axis specification in *Drosophila*. In *Developmental Biology (7th edn)*, Gilbert, S.F., Ed. Sinauer Associates: Sunderland, 2003; pp. 263–304.
  36. Skeiky, Y.A.; Iatrou, K. Synergistic interactions of silkworm chorion promoter-binding factors. *Mol. Cell. Biol.* **1991**, *11*, 1954–1964.
  37. Zhang, D.B.; Wang, Y.; Liu, A.K.; Wang, X.H.; Dang, C.W.; Yao, Q.; Chen, K.P. Phylogenetic analyses of vector mosquito basic helix-loop-helix transcription factors. *Insect Mol. Biol.* **2013**, *22*, 608–621.
  38. Dang, C.W.; Wang, Y.; Chen, K.P.; Yao, Q.; Zhang, D.B.; Guo, M. The basic helix-loop-helix transcription factor family in the pea aphid, *Acyrtosiphon pisum*. *J. Insect Sci.* **2011**, *11*, 84.
  39. Wang, Y.; Chen, K.; Yao, Q.; Wang, W.; Zhu, Z. The basic helix-loop-helix transcription factor

- family in the honey bee, *Apis mellifera*. *J. Insect Sci.* **2008**, *8*, 1–12.
40. Wang, Y.; Chen, K.; Yao, Q.; Wang, W.; Zhi, Z. The basic helix-loop-helix transcription factor family in *Bombyx mori*. *Dev. Genes Evol.* **2007**, *217*, 715–723.
  41. Peng, Y.; Wang, Y.; Tao, X.F.; Zeng, Z.; Johnson, N.A.N.; Yao, Q.; Chen, K.P. A genome-wide survey and analysis of basic helix-loop-helix genes in the Asian citrus psyllid, *Diaphorina citri* (Hemiptera: Psyllidae). *J. Asia Pac. Entomol.* **2017**, *20*, 821–829.
  42. Simionato, E.; Ledent, V.; Richards, G.; Thomas-Chollier, M.; Kerner, P.; Coornaert, D.; Degnan, B.M.; Vervoort, M. Origin and diversification of the basic helix-loop-helix gene family in metazoans: insights from comparative genomics. *BMC Evol. Biol.* **2007**, *7*, 33.
  43. Liu, A.; Wang, Y.; Dang, C.; Zhang, D.; Song, H.; Yao, Q.; Chen, K. A genome-wide identification and analysis of the basic helix-loop-helix transcription factors in the ponerine ant, *Harpegnathos saltator*. *BMC Evol. Biol.* **2012**, *12*, 165.
  44. Fu, K.Y.; Meng, Q.W.; Lü, F.G.; Guo, W.C.; Ahmat, T.; Li, G.Q. The basic helix-loop-helix transcription factors in the Colorado potato beetle *Leptinotarsa decemlineata*. *J. Asia Pac. Entomol.* **2015**, *18*, 197–203.
  45. Liu, X.T.; Wang, Y.; Wang, X.H.; Tao, X.F.; Yao, Q.; Chen, K.P. A genome-wide identification and classification of basic helix-loop-helix genes in the jewel wasp, *Nasonia vitripennis* (Hymenoptera: Pteromalidae). *Genome* **2014**, *57*, 525–536.
  46. Wan, P.J.; Yuan, S.Y.; Wang, W.X.; Chen, X.; Lai, F.X.; Fu, Q. A genome-wide identification and analysis of the basic helix-loop-helix transcription factors in brown planthopper, *Nilaparvata lugens*. *Genes* **2016**, *7*, 100.
  47. Wang, X.H.; Wang, Y.; Zhang, D.B.; Liu, A.K.; Yao, Q.; Chen, K.P. A genome-wide identification of basic helix-loop-helix motifs in *Pediculus humanus corporis* (Phthiraptera: Pediculidae). *J. Insect Sci.* **2014**, *14*, 195.
  48. Zeng, Z.; Wang, Y.; Johnson, N.A.N.; Wang, G.D.; Yao, Q.; Chen, K.P. Identification and phylogenetic analysis of basic helix-loop-helix genes in the diamondback moth. *J. Insect Sci.* **2018**, *18*,
  49. Bitra, K.; Palli, S.R. The members of bHLH transcription factor superfamily are required for female reproduction in the red flour beetle, *Tribolium castaneum*. *J. Insect Physiol.* **2010**, *56*, 1481–1489.
  50. Durand, B.; Drevet, J.; Couble, P. P25 gene regulation in *Bombyx mori* silk gland: two promoter-binding factors have distinct tissue and developmental specificities. *Mol. Cell. Biol.* **1992**, *12*, 5768–5777.
  51. Peyrefitte, S.; Kahn, D.; Haenlin, M. New members of the *Drosophila* Myc transcription factor subfamily revealed by a genome-wide examination for basic helix-loop-helix genes. *Mech. Dev.* **2001**, *104*, 99–104.
  52. Sassu, E.D.; McDermott, J.E.; Keys, B.J.; Esmaeili, M.; Keene, A.C.; Birnbaum, M.J.; DiAngelo, J.R. Mio/dChREBP coordinately increases fat mass by regulating lipid synthesis and feeding behavior in *Drosophila*. *Biochem. Biophys. Res. Commun.* **2012**, *426*, 43–48.
  53. Chen, L.; Zhu, J.; Sun, G.; Raikhel, A.S. The early gene *Broad* is involved in the ecdysteroid hierarchy governing vitellogenesis of the mosquito *Aedes aegypti*. *J. Mol. Endocrinol.* **2004**, *33*, 743–761.
  54. Zhu, J.; Chen, L.; Raikhel, A.S. Distinct roles of Broad isoforms in regulation of the 20-hydroxyecdysone effector gene, *Vitellogenin*, in the mosquito *Aedes aegypti*. *Mol. Cell Endocrinol.* **2007**, *267*, 97–105.
  55. Cruz, J.; Mane-Padros, D.; Zou, Z.; Raikhel, A.S. Distinct roles of isoforms of the heme-liganded nuclear receptor E75, an insect ortholog of the vertebrate Rev-Erb, in mosquito reproduction. *Mol. Cell Endocrinol.* **2012**, *349*, 262–271.
  56. Mane-Padros, D.; Cruz, J.; Cheng, A.; Raikhel, A.S. A critical role of the nuclear receptor HR3 in regulation of gonadotrophic cycles of the mosquito *Aedes aegypti*. *PLoS One* **2012**, *7*, e45019.
  57. Cheng, D.; Qian, W.; Wang, Y.; Meng, M.; Wei, L.; Li, Z.; Kang, L.; Peng, J.; Xia, Q. Nuclear import of transcription factor BR-C is mediated by its interaction with RACK1. *PLoS One* **2014**, *9*, e109111.
  58. Qian, W.; Gang, X.; Zhang, T.; Wei, L.; Yang, X.; Li, Z.; Yang, Y.; Song, L.; Wang, P.; Peng, J., et al. Protein kinase A-mediated phosphorylation of the Broad-Complex transcription factor in

- silkworm suppresses its transcriptional activity. *J. Biol. Chem.* **2017**, *292*, 12460-12470.
59. Jiang, J.; Xu, Y.; Lin, X. Role of Broad-Complex (Br) and Krüppel homolog 1 (Kr-h1) in the Ovary Development of *Nilaparvata lugens*. *Front. Physiol.* **2017**, *8*, 1013.
  60. Konopova, B.; Jindra, M. Broad-Complex acts downstream of Met in juvenile hormone signaling to coordinate primitive holometabolism metamorphosis. *Development* **2008**, *135*, 559–568.
  61. Zhou, B.; Riddiford, L.M. Hormonal regulation and patterning of the broad-complex in the epidermis and wing discs of the tobacco hornworm, *Manduca sexta*. *Dev. Biol.* **2001**, *231*, 125–137.
  62. Moeller, M.E.; Danielsen, E.T.; Herder, R.; O'Connor, M.B.; Rewitz, K.F. Dynamic feedback circuits function as a switch for shaping a maturation-inducing steroid pulse in *Drosophila*. *Development* **2013**, *140*, 4730–4739.
  63. Yang, C.; Lin, Y.; Liu, H.; Shen, G.; Luo, J.; Zhang, H.; Peng, Z.; Chen, E.; Xing, R.; Han, C., et al. The Broad Complex isoform 2 (BrC-Z2) transcriptional factor plays a critical role in vitellogenin transcription in the silkworm *Bombyx mori*. *Biochim. Biophys. Acta* **2014**, *1840*, 2674–2684.
  64. Lin, Y.; Liu, H.; Yang, C.; Gu, J.; Shen, G.; Zhang, H.; Chen, E.; Han, C.; Zhang, Y.; Xu, Y., et al. The POU homeodomain transcription factor POUM2 and broad complex isoform 2 transcription factor induced by 20-hydroxyecdysone collaboratively regulate vitellogenin gene expression and egg formation in the silkworm *Bombyx mori*. *Insect Mol. Biol.* **2017**, *26*, 496–506.
  65. Wang, H.B.; Iwanaga, M.; Kawasaki, H. Activation of *BmWCP10* promoter and regulation by BR-C Z2 in wing disc of *Bombyx mori*. *Insect Biochem. Mol. Biol.* **2009**, *39*, 615–623.
  66. Ali, M.S.; Rahman, R.F.; Swapon, A.H. Transcriptional regulation of cuticular protein glycine-rich13 gene expression in wing disc of *Bombyx mori*, Lepidoptera. *J. Insect Sci.* **2015**, *15*, 71–80.
  67. Ali, M.S.; Mishra, B.; Rahman, R.F.; Swapon, A.H. The silkworm *Bombyx mori* cuticular protein *CPR55* gene is regulated by the transcription factor  $\beta$ FTZ-F1. *J. Insect Sci.* **2016**, *73*, 20–27.
  68. Terashima, J.; Bownes, M. E75A and E75B have opposite effects on the apoptosis/development choice of the *Drosophila* egg chamber. *Cell Death Differ.* **2006**, *13*, 454–464.
  69. Xiang, Y.; Liu, Z.; Huang, X. *br* regulates the expression of the ecdysone biosynthesis gene *npc1*. *Dev. Biol.* **2010**, *344*, 800–808.
  70. Wang, H.B.; Nita, M.; Iwanaga, M.; Kawasaki, H.  $\beta$ FTZ-F1 and Broad-Complex positively regulate the transcription of the wing cuticle protein gene, *BmWCP5*, in wing discs of *Bombyx mori*. *Insect Biochem. Mol. Biol.* **2009**, *39*, 624–633.
  71. Mai, T.; Chen, S.; Lin, X.; Zhang, X.; Zou, X.; Feng, Q.; Zheng, S. 20-hydroxyecdysone positively regulates the transcription of the antimicrobial peptide, leibocin, via BmEts and BmBR-C Z4 in the midgut of *Bombyx mori* during metamorphosis. *Dev. Comp. Immunol.* **2017**, *74*, 10–18.
  72. Komori, H.; Xiao, Q.; Janssens, D.H.; Dou, Y.; Lee, C.Y. Trithorax maintains the functional heterogeneity of neural stem cells through the transcription factor buttonhead. *eLife* **2014**, *3*, e03502.
  73. Chang, C.C.; Hsiao, Y.M.; Huang, T.Y.; Cook, C.E.; Shigenobu, S.; Chang, T.H. Noncanonical expression of *caudal* during early embryogenesis in the pea aphid *Acyrtosiphon pisum*: maternal cad-driven posterior development is not conserved. *Insect Mol. Biol.* **2013**, *22*, 442–455.
  74. Macdonald, P.M.; Struhl, G. A molecular gradient in early *Drosophila* embryos and its role in specifying the body pattern. *Nature* **1986**, *324*, 537–545.
  75. Dearolf, C.R.; Topol, J.; Parker, C.S. The *caudal* gene product is a direct activator of *fushi tarazu* transcription during *Drosophila* embryogenesis. *Nature* **1989**, *341*, 340–343.
  76. Kühnlein, R.P.; Brönnner, G.; Taubert, H.; Schuh, R. Regulation of *Drosophila spalt* gene expression. *Mech. Dev.* **1997**, *66*, 107–118.
  77. Ryu, J.H.; Nam, K.B.; Oh, C.T.; Nam, H.J.; Kim, S.H.; Yoon, J.H.; Seong, J.K.; Yoo, M.A.; Jang, I.H.; Brey, P.T., et al. The homeobox gene *Caudal* regulates constitutive local expression of antimicrobial peptide genes in *Drosophila* epithelia. *Mol. Cell. Biol.* **2004**, *24*, 172–185.
  78. Ryu, J.H.; Kim, S.H.; Lee, H.Y.; Bai, J.Y.; Nam, Y.D.; Bae, J.W.; Lee, D.G.; Shin, S.C.; Ha, E.M.; Lee, W.J. Innate immune homeostasis by the homeobox gene *caudal* and commensal-gut mutualism in *Drosophila*. *Science* **2008**, *319*, 777–782.
  79. Junell, A.; Uvell, H.; Davis, M.M.; Edlundh-Rose, E.; Antonsson, A.; Pick, L.; Engström, Y. The

- POU transcription factor Drifter/Ventral veinless regulates expression of *Drosophila* immune defense genes. *Mol. Cell Biol.* **2010**, *30*, 3672–3684.
80. Nakao, H. Anterior and posterior centers jointly regulate *Bombyx* embryo body segmentation. *Dev. Biol.* **2012**, *371*, 293–301.
  81. Goulding, S.E.; White, N.M.; Jarman, A.P. *cato* encodes a basic helix-loop-helix transcription factor implicated in the correct differentiation of *Drosophila* sense organs. *Dev. Biol.* **2000**, *221*, 120–131.
  82. Sourmeli, S.; Papantonis, A.; Lecanidou, R. BmCbZ, an insect-specific factor featuring a composite DNA-binding domain, interacts with BmC/EBP $\gamma$ . *Biochem. Biophys. Res. Commun.* **2005**, *338*, 1957–1965.
  83. Montell, D.J.; Rorth, P.; Spradling, A.C. *slow border cells*, a locus required for a developmentally regulated cell migration during oogenesis, encodes *Drosophila* C/EBP. *Cell* **1992**, *71*, 51–62.
  84. Levine, B.; Hackney, J.F.; Bergen, A.; Dobens, L., 3rd; Truesdale, A.; Dobens, L. Opposing interactions between *Drosophila* Cut and the C/EBP encoded by slow border cells direct apical constriction and epithelial invagination. *Dev. Biol.* **2010**, *344*, 196–209.
  85. Masoner, V.; Das, R.; Pence, L.; Anand, G.; LaFerriere, H.; Zars, T.; Bouyain, S.; Dobens, L.L. The kinase domain of *Drosophila* Tribbles is required for turnover of fly C/EBP during cell migration. *Dev. Biol.* **2013**, *375*, 33–44.
  86. Sourmeli, S.; Papantonis, A.; Lecanidou, R. A novel role for the *Bombyx* Slbo homologue, BmC/EBP, in insect choriogenesis. *Biochem. Biophys. Res. Commun.* **2005**, *337*, 713–719.
  87. Papantonis, A.; Sourmeli, S.; Lecanidou, R. Chorion gene activation and repression is dependent on BmC/EBP expression and binding to cognate *cis*-elements. *Biochem. Biophys. Res. Commun.* **2008**, *369*, 905–909.
  88. Meredith, J.M.; Munks, R.J.; Grail, W.; Hurd, H.; Eggleston, P.; Lehane, M.J. A novel association between clustered NF- $\kappa$ B and C/EBP binding sites is required for immune regulation of mosquito *Defensin* genes. *Insect Mol. Biol.* **2006**, *15*, 393–401.
  89. Liang, L.N.; Zhang, L.L.; Zeng, B.J.; Zheng, S.C.; Feng, Q.L. Transcription factor CAAT/enhancer-binding protein is involved in regulation of expression of sterol carrier protein x in *Spodoptera litura*. *Insect Mol. Biol.* **2015**, *24*, 551–560.
  90. McGinnis, N.; Ragnhildstveit, E.; Veraksa, A.; McGinnis, W. A cap 'n' collar protein isoform contains a selective Hox repressor function. *Development* **1998**, *125*, 4553–4564.
  91. Deng, H.; Kerppola, T.K. Regulation of *Drosophila* metamorphosis by xenobiotic response regulators. *PLoS Genet.* **2013**, *9*, e1003263.
  92. Sykiotis, G.P.; Bohmann, D. Keap1/Nrf2 signaling regulates oxidative stress tolerance and lifespan in *Drosophila*. *Dev. Cell* **2008**, *14*, 76–85.
  93. Jain, A.; Rusten, T.E.; Katheder, N.; Elvenes, J.; Bruun, J.A.; Sjøttem, E.; Lamark, T.; Johansen, T. p62/sequestosome-1, autophagy-related Gene 8, and autophagy in *Drosophila* are regulated by nuclear factor erythroid 2-related factor 2 (NRF2), independent of transcription factor TFEB. *J. Biol. Chem.* **2015**, *290*, 14945–14962.
  94. Misra, J.R.; Horner, M.A.; Lam, G.; Thummel, C.S. Transcriptional regulation of xenobiotic detoxification in *Drosophila*. *Genes Dev.* **2011**, *25*, 1796–1806.
  95. Misra, J.R.; Lam, G.; Thummel, C.S. Constitutive activation of the Nrf2/Keap1 pathway in insecticide-resistant strains of *Drosophila*. *Insect Biochem. Mol. Biol.* **2013**, *43*, 1116–1124.
  96. Wan, H.; Liu, Y.; Li, M.; Zhu, S.; Li, X.; Pittendrigh, B.R.; Qiu, X. Nrf2/Maf-binding-site-containing functional *Cyp6a2* allele is associated with DDT resistance in *Drosophila melanogaster*. *Pest Manag. Sci.* **2014**, *70*, 1048–1058.
  97. Guio, L.; Barron, M.G.; González, J. The transposable element *Bari-Jheh* mediates oxidative stress response in *Drosophila*. *Mol. Ecol.* **2014**, *23*, 2020–2030.
  98. Pitoniak, A.; Bohmann, D. Mechanisms and functions of Nrf2 signaling in *Drosophila*. *Free Radic. Biol. Med.* **2015**, *88*, 302–313.
  99. Wilding, C.S. Regulating resistance: CncC/Maf, antioxidant response elements and the overexpression of detoxification genes in insecticide resistance. *Curr. Opin. Insect Sci.* **2018**, *27*, 89–96.
  100. Kalsi, M.; Palli, S.R. Transcription factors, CncC and Maf, regulate expression of CYP6BQ genes



- responsible for deltamethrin resistance in *Tribolium castaneum*. *Insect Biochem. Mol. Biol.* **2015**, *65*, 47–56.
101. Kalsi, M.; Palli, S.R. Cap n collar transcription factor regulates multiple genes coding for proteins involved in insecticide detoxification in the red flour beetle, *Tribolium castaneum*. *Insect Biochem. Mol. Biol.* **2017**, *90*, 43–52.
  102. Kalsi, M.; Palli, S.R. Transcription factor cap n collar C regulates multiple cytochrome P450 genes conferring adaptation to potato plant allelochemicals and resistance to imidacloprid in *Leptinotarsa decemlineata* (Say). *Insect Biochem. Mol. Biol.* **2017**, *83*, 1–12.
  103. Peng, T.; Pan, Y.; Gao, X.; Xi, J.; Zhang, L.; Yang, C.; Bi, R.; Yang, S.; Xin, X.; Shang, Q. Cytochrome P450 *CYP6DA2* regulated by *cap 'n' collar isoform C (CncC)* is associated with gossypol tolerance in *Aphis gossypii* Glover. *Insect Mol. Biol.* **2016**, *25*, 450–459.
  104. Hu, J.; Chen, J.; Wang, H.; Mao, T.; Li, J.; Cheng, X.; Hu, J.; Xue, B.; Li, B. Cloning and functional analysis of *CncC* and *Keap1* genes in silkworm. *J. Agric. Food Chem.* **2018**, *66*, 2630–2636.
  105. Cheng, X.; Hu, J.; Li, J.; Chen, J.; Wang, H.; Mao, T.; Xue, B.; Li, B. The silk gland damage and the transcriptional response to detoxifying enzymes-related genes of *Bombyx mori* under phoxim exposure. *Chemosphere* **2018**, *209*, 964–971.
  106. Crozatier, M.; Valle, D.; Dubois, L.; Ibensouda, S.; Vincent, A. *collier*, a novel regulator of *Drosophila* head development, is expressed in a single mitotic domain. *Curr. Biol.* **1996**, *6*, 707–718.
  107. Dubois, L.; Enriquez, J.; Daburon, V.; Crozet, F.; Lebreton, G.; Crozatier, M.; Vincent, A. *Collier* transcription in a single *Drosophila* muscle lineage: the combinatorial control of muscle identity. *Development* **2007**, *134*, 4347–4355.
  108. Crozatier, M.; Vincent, A. Control of multidendritic neuron differentiation in *Drosophila*: the role of *Collier*. *Dev. Biol.* **2008**, *315*, 232–242.
  109. Enriquez, J.; de Taffin, M.; Crozatier, M.; Vincent, A.; Dubois, L. Combinatorial coding of *Drosophila* muscle shape by *Collier* and *Nautilus*. *Dev. Biol.* **2012**, *363*, 27–39.
  110. Benmimoun, B.; Polesello, C.; Haenlin, M.; Waltzer, L. The EBF transcription factor *Collier* directly promotes *Drosophila* blood cell progenitor maintenance independently of the niche. *Proc. Natl. Acad. Sci. U. S. A.* **2015**, *112*, 9052–9057.
  111. Hewes, R.S.; Schaefer, A.M.; Taghert, P.H. The *cryptocephal* gene (*ATF4*) encodes multiple basic-leucine zipper proteins controlling molting and metamorphosis in *Drosophila*. *Genetics* **2000**, *155*, 1711–1723.
  112. Gauthier, S.A.; Hewes, R.S. Transcriptional regulation of neuropeptide and peptide hormone expression by the *Drosophila dimmed* and *cryptocephal* genes. *J. Exp. Biol.* **2006**, *209*, 1803–1815.
  113. Gauthier, S.A.; VanHaften, E.; Cherbas, L.; Cherbas, P.; Hewes, R.S. *Cryptocephal*, the *Drosophila melanogaster* *ATF4*, is a specific coactivator for ecdysone receptor isoform B2. *PLoS Genet.* **2012**, *8*, e1002883.
  114. Belvin, M.P.; Zhou, H.; Yin, J.C. The *Drosophila dCREB2* gene affects the circadian clock. *Neuron* **1999**, *22*, 777–787.
  115. Tanenhaus, A.K.; Zhang, J.; Yin, J.C. *In vivo* circadian oscillation of *dCREB2* and *NF-κB* activity in the *Drosophila* nervous system. *PLoS One* **2012**, *7*, e45130.
  116. Zhang, J.; Tanenhaus, A.K.; Davis, J.C.; Hanlon, B.M.; Yin, J.C. Spatio-temporal *in vivo* recording of *dCREB2* dynamics in *Drosophila* long-term memory processing. *Neurobiol. Learn. Mem.* **2015**, *118*, 80–88.
  117. Song, H.; Sun, Y.; Zhang, Y.; Li, M. Molecular cloning and characterization of *Bombyx mori* *CREB* gene. *Arch. Insect Biochem. Physiol.* **2009**, *71*, 31–44.
  118. Liu, L.; Qian, X.; Chao, M.; Zhao, Y.; Huang, J.; Wang, T.; Sun, F.; Ling, E.; Song, H. Aluminum toxicity related to *SOD* and expression of *presenilin* and *CREB* in *Bombyx mori*. *Arch. Insect Biochem. Physiol.* **2018**, *99*, e21480.
  119. van den Berg, M.; Verbaarschot, P.; Hontelez, S.; Vet, L.E.; Dicke, M.; Smid, H.M. *CREB* expression in the brains of two closely related parasitic wasp species that differ in long-term memory formation. *Insect Mol. Biol.* **2010**, *19*, 367–379.
  120. Gehring, K.B.; Heufelder, K.; Kersting, I.; Eisenhardt, D. Abundance of phosphorylated *Apis mellifera* *CREB* in the honeybee's mushroom body inner compact cells varies with age. *J. Comp.*

- Neurol.* **2016**, *524*, 1165–1180.
121. Gehring, K.B.; Heufelder, K.; Feige, J.; Bauer, P.; Dyck, Y.; Ehrhardt, L.; Kühnemund, J.; Bergmann, A.; Göbel, J.; Isecke, M., et al. Involvement of phosphorylated *Apis mellifera* CREB in gating a honeybee's behavioral response to an external stimulus. *Learn. Mem.* **2016**, *23*, 195–207.
  122. Gao, J.; Sun, Y.; Sun, Y.; Chen, C.; Kausar, S.; Tian, J.; Zhu, B.; Liu, C. Identification and function of cAMP response element binding protein in Oak silkworm *Antheraea pernyi*. *J. Invertebr. Pathol.* **2018**, *151*, 14–20.
  123. Abrams, E.W.; Andrew, D.J. CrebA regulates secretory activity in the *Drosophila* salivary gland and epidermis. *Development* **2005**, *132*, 2743–2758.
  124. Fox, R.M.; Hanlon, C.D.; Andrew, D.J. The CrebA/Creb3-like transcription factors are major and direct regulators of secretory capacity. *J. Cell Biol.* **2010**, *191*, 479–492.
  125. Iyer, S.C.; Ramachandran Iyer, E.P.; Meduri, R.; Rubaharan, M.; Kuntimaddi, A.; Karamsetty, M.; Cox, D.N. Cut, via CrebA, transcriptionally regulates the COPII secretory pathway to direct dendrite development in *Drosophila*. *J. Cell Sci.* **2013**, *126*, 4732–4745.
  126. Kang, K.; Yang, P.; Pang, R.; Yue, L.; Zhang, W. *Cycle* affects imidacloprid efficiency by mediating cytochrome P450 expression in the brown planthopper *Nilaparvata lugens*. *Insect Mol. Biol.* **2017**, *26*, 522–529.
  127. Rutila, J.E.; Suri, V.; Le, M.; So, W.V.; Rosbash, M.; Hall, J.C. CYCLE is a second bHLH-PAS clock protein essential for circadian rhythmicity and transcription of *Drosophila period* and *timeless*. *Cell* **1998**, *93*, 805–814.
  128. Bae, K.; Lee, C.; Hardin, P.E.; Edery, I. dCLOCK is present in limiting amounts and likely mediates daily interactions between the dCLOCK-CYC transcription factor and the PER-TIM complex. *J. Neurosci.* **2000**, *20*, 1746–1753.
  129. Glossop, N.R.; Houl, J.H.; Zheng, H.; Ng, F.S.; Dudek, S.M.; Hardin, P.E. VRILLE feeds back to control circadian transcription of *Clock* in the *Drosophila* circadian oscillator. *Neuron* **2003**, *37*, 249–261.
  130. Cyran, S.A.; Buchsbaum, A.M.; Reddy, K.L.; Lin, M.C.; Glossop, N.R.; Hardin, P.E.; Young, M.W.; Storti, R.V.; Blau, J. *vrille*, *Pdp1*, and *dClock* form a second feedback loop in the *Drosophila* circadian clock. *Cell* **2003**, *112*, 329–341.
  131. Bajjar, A.; Jindra, M.; Dolezel, D. Autonomous regulation of the insect gut by circadian genes acting downstream of juvenile hormone signaling. *Proc. Natl. Acad. Sci. U. S. A.* **2013**, *110*, 4416–4421.
  132. Matsumoto, A.; Ukai-Tadenuma, M.; Yamada, R.G.; Houl, J.; Uno, K.D.; Kasukawa, T.; Dauwalder, B.; Itoh, T.Q.; Takahashi, K.; Ueda, R., et al. A functional genomics strategy reveals *clockwork orange* as a transcriptional regulator in the *Drosophila* circadian clock. *Genes Dev.* **2007**, *21*, 1687–1700.
  133. Brown, N.L.; Paddock, S.W.; Sattler, C.A.; Cronmiller, C.; Thomas, B.J.; Carroll, S.B. *daughterless* is required for *Drosophila* photoreceptor cell determination, eye morphogenesis, and cell cycle progression. *Dev. Biol.* **1996**, *179*, 65–78.
  134. Andrade-Zapata, I.; Baonza, A. The bHLH factors Extramacrochaetae and Daughterless control cell cycle in *Drosophila* imaginal discs through the transcriptional regulation of the *cdc25* phosphatase *string*. *PLoS Genet.* **2014**, *10*, e1004233.
  135. Miguel-Aliaga, I.; Allan, D.W.; Thor, S. Independent roles of the *dachshund* and *eyes absent* genes in BMP signaling, axon pathfinding and neuronal specification. *Development* **2004**, *131*, 5837–5848.
  136. Pérez-Zamorano, B.; Rosas-Madrigal, S.; Lozano, O.A.M.; Castillo Méndez, M.; Valverde-Garduño, V. Identification of *cis*-regulatory sequences reveals potential participation of *lola* and *Deaf1* transcription factors in *Anopheles gambiae* innate immune response. *PLoS One* **2017**, *12*, e0186435.
  137. Armand, P.; Knapp, A.C.; Hirsch, A.J.; Wieschaus, E.F.; Cole, M.D. A novel basic helix-loop-helix protein is expressed in muscle attachment sites of the *Drosophila* epidermis. *Mol. Cell. Biol.* **1994**, *14*, 4145–4154.
  138. Egoz-Matia, N.; Nachman, A.; Halachmi, N.; Toder, M.; Klein, Y.; Salzberg, A. Spatial regulation of cell adhesion in the *Drosophila* wing is mediated by Delilah, a potent activator of  $\beta$ PS integrin expression. *Dev. Biol.* **2011**, *351*, 99–109.
  139. Shen, S.P.; Aleksic, J.; Russell, S. Identifying targets of the Sox domain protein Dichaete in the

- Drosophila* CNS via targeted expression of dominant negative proteins. *BMC Dev. Biol.* **2013**, *13*, 1.
140. Zamboni, R.A.; Nandakumar, M.; Vakharia, V.N.; Wu, L.P. The Toll pathway is important for an antiviral response in *Drosophila*. *Proc. Natl. Acad. Sci. U. S. A.* **2005**, *102*, 7257–7262.
  141. Tanji, T.; Yun, E.Y.; Ip, Y.T. Heterodimers of NF- $\kappa$ B transcription factors DIF and Relish regulate antimicrobial peptide genes in *Drosophila*. *Proc. Natl. Acad. Sci. U. S. A.* **2010**, *107*, 14715–14720.
  142. Park, D.; Han, M.; Kim, Y.C.; Han, K.A.; Taghert, P.H. Ap-let neurons—a peptidergic circuit potentially controlling ecdysial behavior in *Drosophila*. *Dev. Biol.* **2004**, *269*, 95–108.
  143. Park, D.; Shafer, O.T.; Shepherd, S.P.; Suh, H.; Trigg, J.S.; Taghert, P.H. The *Drosophila* basic helix-loop-helix protein DIMMED directly activates *PHM*, a gene encoding a neuropeptide-amidating enzyme. *Mol. Cell Biol.* **2008**, *28*, 410–421.
  144. Park, D.; Veenstra, J.A.; Park, J.H.; Taghert, P.H. Mapping peptidergic cells in *Drosophila*: where DIMM fits in. *PLoS One* **2008**, *3*, e1896.
  145. Park, D.; Hadžić, T.; Yin, P.; Rusch, J.; Abruzzi, K.; Rosbash, M.; Skeath, J.B.; Panda, S.; Sweedler, J.V.; Taghert, P.H. Molecular organization of *Drosophila* neuroendocrine cells by *Dimmed*. *Curr. Biol.* **2011**, *21*, 1515–1524.
  146. Hadžić, T.; Park, D.; Abruzzi, K.C.; Yang, L.; Trigg, J.S.; Rohs, R.; Rosbash, M.; Taghert, P.H. Genome-wide features of neuroendocrine regulation in *Drosophila* by the basic helix-loop-helix transcription factor DIMMED. *Nucleic Acids Res.* **2015**, *43*, 2199–2215.
  147. Beebe, K.; Park, D.; Taghert, P.H.; Micchelli, C.A. The *Drosophila* prosecretory transcription factor *dimmed* is dynamically regulated in adult enteroendocrine cells and protects against Gram-negative infection. In *G3*, 2015; Vol. 5, pp 1517–1524.
  148. Zhao, X.M.; Liu, C.; Jiang, L.J.; Li, Q.Y.; Zhou, M.T.; Cheng, T.C.; Mita, K.; Xia, Q.Y. A juvenile hormone transcription factor Bmdimm-fibroin H chain pathway is involved in the synthesis of silk protein in silkworm, *Bombyx mori*. *J. Biol. Chem.* **2015**, *290*, 972–986.
  149. Zhou, C.; Zha, X.; Shi, P.; Wei, S.; Wang, H.; Zheng, R.; Xia, Q. Multiprotein bridging factor 2 regulates the expression of the *fibroin heavy chain* gene by interacting with Bmdimmed in the silkworm *Bombyx mori*. *Insect Mol. Biol.* **2016**, *25*, 509–518.
  150. Diederich, R.J.; Pattatucci, A.M.; Kaufman, T.C. Developmental and evolutionary implications of labial, Deformed and engrailed expression in the *Drosophila* head. *Development* **1991**, *113*, 273–281.
  151. Ratnaparkhi, G.S.; Duong, H.A.; Courey, A.J. Dorsal interacting protein 3 potentiates activation by *Drosophila* Rel homology domain proteins. *Dev. Comp. Immunol.* **2008**, *32*, 1290–1300.
  152. Zehavi, Y.; Kuznetsov, O.; Ovadia-Shochat, A.; Juven-Gershon, T. Core promoter functions in the regulation of gene expression of *Drosophila* dorsal target genes. *J. Biol. Chem.* **2014**, *289*, 11993–12004.
  153. Zhong, X.; Rao, X.J.; Yi, H.Y.; Lin, X.Y.; Huang, X.H.; Yu, X.Q. Co-expression of Dorsal and Rel2 negatively regulates antimicrobial peptide expression in the tobacco hornworm *Manduca sexta*. *Sci. Rep.* **2016**, *6*, 20654.
  154. Kappes, G.; Deshpande, G.; Mulvey, B.B.; Horabin, J.I.; Schedl, P. The *Drosophila* Myc gene, *diminutive*, is a positive regulator of the *Sex-lethal* establishment promoter, *Sxl-Pe*. *Proc. Natl. Acad. Sci. U. S. A.* **2011**, *108*, 1543–1548.
  155. Segev, E.; Halachmi, N.; Salzberg, A.; Ben-Arie, N. Nato3 is an evolutionarily conserved bHLH transcription factor expressed in the CNS of *Drosophila* and mouse. *Mech. Dev.* **2001**, *106*, 197–202.
  156. Younger-Shepherd, S.; Vaessin, H.; Bier, E.; Jan, L.Y.; Jan, Y.N. *deadpan*, an essential pan-neural gene encoding an HLH protein, acts as a denominator in *Drosophila* sex determination. *Cell* **1992**, *70*, 911–922.
  157. Lu, H.; Kozhina, E.; Mahadevaraju, S.; Yang, D.; Avila, F.W.; Erickson, J.W. Maternal Groucho and bHLH repressors amplify the dose-sensitive X chromosome signal in *Drosophila* sex determination. *Dev. Biol.* **2008**, *323*, 248–260.
  158. San-Juán, B.P.; Baonza, A. The bHLH factor *deadpan* is a direct target of Notch signaling and regulates neuroblast self-renewal in *Drosophila*. *Dev. Biol.* **2011**, *352*, 70–82.
  159. Zhu, S.; Wildonger, J.; Barshow, S.; Younger, S.; Huang, Y.; Lee, T. The bHLH repressor *Deadpan* regulates the self-renewal and specification of *Drosophila* larval neural stem cells independently of Notch. *PLoS One* **2012**, *7*, e46724.

160. Janssens, D.H.; Hamm, D.C.; Anhezini, L.; Xiao, Q.; Siller, K.H.; Siegrist, S.E.; Harrison, M.M.; Lee, C.Y. An Hdac1/Rpd3-poised circuit balances continual self-renewal and rapid restriction of developmental potential during asymmetric stem cell division. *Dev. Cell* **2017**, *40*, 367–380.
161. Wallace, K.; Liu, T.H.; Vaessin, H. The pan-neural bHLH proteins DEADPAN and ASENSE regulate mitotic activity and cdk inhibitor *dacapo* expression in the *Drosophila* larval optic lobes. *Genesis* **2000**, *26*, 77–85.
162. Mavromatakis, Y.E.; Tomlinson, A. R7 photoreceptor specification in the developing *Drosophila* eye: The role of the transcription factor Deadpan. *PLoS Genet.* **2016**, *12*, e1006159.
163. Mysore, K.; Sun, L.; Tomchaney, M.; Sullivan, G.; Adams, H.; Piscoya, A.S.; Severson, D.W.; Syed, Z.; Duman-Scheel, M. siRNA-mediated silencing of *doublesex* during female development of the dengue vector mosquito *Aedes aegypti*. *PLoS Negl. Trop. Dis.* **2015**, *9*, e0004213.
164. Shukla, J.N.; Nagaraju, J. Two female-specific DSX proteins are encoded by the sex-specific transcripts of *dsx*, and are required for female sexual differentiation in two wild silkworm species, *Antheraea assama* and *Antheraea mylitta* (Lepidoptera, Saturniidae). *Insect Biochem. Mol. Biol.* **2010**, *40*, 672–682.
165. Velasque, M.; Qiu, L.; Mikheyev, A.S. The *Doublesex* sex determination pathway regulates reproductive division of labor in honey bees. *bioRxiv* **2018**, 10.1101/314492.
166. Duan, J.; Xu, H.; Wang, F.; Ma, S.; Zha, X.; Guo, H.; Zhao, P.; Xia, Q. Novel female-specific trans-spliced and alternative splice forms of *dsx* in the silkworm *Bombyx mori*. *Biochem. Biophys. Res. Commun.* **2013**, *431*, 6306–6305.
167. Duan, J.; Xu, H.; Guo, H.; O'Brochta, D.A.; Wang, F.; Ma, S.; Zhang, L.; Zha, X.; Zhao, P.; Xia, Q. New insights into the genomic organization and splicing of the *doublesex* gene, a terminal regulator of sexual differentiation in the silkworm *Bombyx mori*. *PLoS One* **2013**, *8*, e79703.
168. Xu, J.; Zhan, S.; Chen, S.; Zeng, B.; Li, Z.; James, A.A.; Tan, A.; Huang, Y. Sexually dimorphic traits in the silkworm, *Bombyx mori*, are regulated by *doublesex*. *Insect Biochem. Mol. Biol.* **2017**, *80*, 42–51.
169. Gotoh, H.; Miyakawa, H.; Ishikawa, A.; Ishikawa, Y.; Sugime, Y.; Emlen, D.J.; Lavine, L.C.; Miura, T. Developmental link between sex and nutrition; *doublesex* regulates sex-specific mandible growth via juvenile hormone signaling in stag beetles. *PLoS Genet.* **2014**, *10*, e1004098.
170. Burtis, K.C.; Coschigano, K.T.; Baker, B.S.; Wensink, P.C. The *doublesex* proteins of *Drosophila melanogaster* bind directly to a sex-specific yolk protein gene enhancer. *EMBO J.* **1991**, *10*, 2577–2582.
171. Shirangi, T.R.; Dufour, H.D.; Williams, T.M.; Carroll, S.B. Rapid evolution of sex pheromone-producing enzyme expression in *Drosophila*. *PLoS Biol.* **2009**, *7*, e1000168.
172. Williams, T.M.; Selegue, J.E.; Werner, T.; Gompel, N.; Kopp, A.; Carroll, S.B. The regulation and evolution of a genetic switch controlling sexually dimorphic traits in *Drosophila*. *Cell* **2008**, *134*, 610–623.
173. Luo, S.D.; Shi, G.W.; Baker, B.S. Direct targets of the *D. melanogaster* DSXF protein and the evolution of sexual development. *Development* **2011**, *138*, 2761–2771.
174. Ledón-Rettig, C.C.; Zattara, E.E.; Moczek, A.P. Asymmetric interactions between *doublesex* and tissue- and sex-specific target genes mediate sexual dimorphism in beetles. *Nat. Commun.* **2017**, *8*, 14593.
175. Rice, G.; Barmina, O.; Hu, K.; Kopp, A. Evolving *doublesex* expression correlates with the origin and diversification of male sexual ornaments in the *Drosophila immigrans* species group. *Evol. Dev.* **2018**, *20*, 78–88.
176. Zhuo, J.C.; Hu, Q.L.; Zhang, H.H.; Zhang, M.Q.; Jo, S.B.; Zhang, C.X. Identification and functional analysis of the *doublesex* gene in the sexual development of a hemimetabolous insect, the brown planthopper. *Insect Biochem. Mol. Biol.* **2018**, *102*, 31–42.
177. Beckers, O.M.; Kijimoto, T.; Moczek, A.P. *doublesex* alters aggressiveness as a function of social context and sex in the polyphenic beetle *Onthophagus taurus*. *Anim. Behav.* **2017**, *132*, 261–269.
178. Sugimoto, T.N.; Fujii, T.; Kayukawa, T.; Sakamoto, H.; Ishikawa, Y. Expression of a *doublesex* homologue is altered in sexual mosaics of *Ostrinia scapularis* moths infected with Wolbachia. *Insect Biochem. Mol. Biol.* **2010**, *40*, 847–854.
179. Ruiz, M.F.; Alvarez, M.; Eirin-Lopez, J.M.; Sarno, F.; Kremer, L.; Barbero, J.L.; Sanchez, L. An

- unusual role for *doublesex* in sex determination in the Dipteran *Sciara*. *Genetics* **2015**, *200*, 1181–1199.
180. Du, Q.; Wen, L.; Zheng, S.C.; Bi, H.L.; Huang, Y.P.; Feng, Q.L.; Liu, L. Identification and functional characterization of *doublesex* gene in the testis of *Spodoptera litura*. *Insect Sci.* **2018**, 10.1111/1744-7917.12608.
  181. Shukla, J.N.; Palli, S.R. Doublesex target genes in the red flour beetle, *Tribolium castaneum*. *Sci. Rep.* **2012**, *2*, 948.
  182. Ito, Y.; Harigai, A.; Nakata, M.; Hosoya, T.; Araya, K.; Oba, Y.; Ito, A.; Ohde, T.; Yaginuma, T.; Niimi, T. The role of *doublesex* in the evolution of exaggerated horns in the Japanese rhinoceros beetle. *EMBO Rep.* **2013**, *14*, 561–567.
  183. Morita, S.; Ando, T.; Maeno, A.; Mizutani, T.; Mase, M.; Shigenobu, S.; Niimi, T. *doublesex* regulates sexually dimorphic beetle horn formation by integrating spatial and temporal developmental contexts in the Japanese rhinoceros beetle *Trypoxylus dichotomus*. *bioRxiv* **2018**, 10.1101/328120.
  184. Jiang, L.; Crews, S.T. The *Drosophila dysfusion* basic helix-loop-helix (bHLH)-PAS gene controls tracheal fusion and levels of the tracheless bHLH-PAS protein. *Mol. Cell Biol.* **2003**, *23*, 5625–5637.
  185. Jiang, L.; Crews, S.T. *dysfusion* transcriptional control of *Drosophila* tracheal migration, adhesion, and fusion. *Mol. Cell Biol.* **2006**, *26*, 6547–6556.
  186. Jiang, L.; Crews, S.T. Transcriptional specificity of *Drosophila* Dysfusion and the control of tracheal fusion cell gene expression. *J. Biol. Chem.* **2007**, *282*, 28659–28668.
  187. Córdoba, S.; Estella, C. The bHLH-PAS transcription factor Dysfusion regulates tarsal joint formation in response to Notch activity during *Drosophila* leg development. *PLoS Genet.* **2014**, *10*, e1004621.
  188. Abbas, M.N.; Kausar, S.; Sun, Y.X.; Sun, Y.; Wang, L.; Qian, C.; Wei, G.Q.; Zhu, B.J.; Liu, C.L. Molecular cloning, expression, and characterization of E2F transcription factor 4 from *Antheraea pernyi*. *Bull. Entomol. Res.* **2017**, *107*, 839–846.
  189. Tian, L.; Ma, L.; Guo, E.; Deng, X.; Ma, S.; Xia, Q.; Cao, Y.; Li, S. 20-Hydroxyecdysone upregulates Atg genes to induce autophagy in the *Bombyx* fat body. *Autophagy* **2013**, *9*, 1172–1187.
  190. Sun, W.; Wang, C.F.; Zhang, Z. Transcription factor E74A affects the ecdysone titer by regulating the expression of the EO gene in the silkworm, *Bomby mori*. *Biochim. Biophys. Acta* **2017**, *1861*, 551–558.
  191. Frank, H.O.; Sanchez, D.G.; de Freitas Oliveira, L.; Kobarg, J.; Monesi, N. The *Drosophila melanogaster* Eip74EF-PA transcription factor directly binds the sciarid *BhC4-1* promoter. *Genesis* **2017**, *55*, e23075.
  192. Sun, G.; Zhu, J.; Raikhel, A.S. The early gene E74B isoform is a transcriptional activator of the ecdysteroid regulatory hierarchy in mosquito vitellogenesis. *Mol. Cell Endocrinol.* **2004**, *218*, 95–105.
  193. Li, K.; Tian, L.; Guo, Z.; Guo, S.; Zhang, J.; Gu, S.H.; Palli, S.R.; Cao, Y.; Li, S. 20-hydroxyecdysone (20E) primary response gene *E75* isoforms mediate steroidogenesis autoregulation and regulate developmental timing in *Bombyx*. *J. Biol. Chem.* **2016**, *291*, 18163–18175.
  194. Kamae, Y.; Uryu, O.; Miki, T.; Tomioka, K. The nuclear receptor genes *HR3* and *E75* are required for the circadian rhythm in a primitive insect. *PLoS One* **2014**, *9*, e114899.
  195. Jaumouillé, E.; Machado Almeida, P.; Stähli, P.; Koch, R.; Nagoshi, E. Transcriptional regulation via nuclear receptor crosstalk required for the *Drosophila* circadian clock. *Curr. Biol.* **2015**, *25*, 1502–1508.
  196. Cao, C.; Liu, Y.; Lehmann, M. Fork head controls the timing and tissue selectivity of steroid-induced developmental cell death. *J. Cell Biol.* **2007**, *176*, 843–852.
  197. Hiruma, K.; Riddiford, L.M. Differential control of MHR3 promoter activity by isoforms of the ecdysone receptor and inhibitory effects of E75A and MHR3. *Dev. Biol.* **2004**, *272*, 510–521.
  198. Hiruma, K.; Riddiford, L.M. The coordination of the sequential appearance of MHR4 and dopa decarboxylase during the decline of the ecdysteroid titer at the end of the molt. *Mol. Cell Endocrinol.* **2007**, *276*, 71–79.
  199. Siaussat, D.; Bozzolan, F.; Queguiner, I.; Porcheron, P.; Debernard, S. Effects of juvenile hormone on 20-hydroxyecdysone-inducible EcR, HR3, E75 gene expression in imaginal wing cells of *Plodia interpunctella* lepidoptera. *Eur. J. Biochem.* **2004**, *271*, 3017–3027.

200. Liu, X.; Dai, F.; Guo, E.; Li, K.; Ma, L.; Tian, L.; Cao, Y.; Zhang, G.; Palli, S.R.; Li, S. 20-hydroxyecdysone (20E) primary response gene E93 modulates 20E signaling to promote *Bombyx* larval-pupal metamorphosis. *J. Biol. Chem.* **2015**, *290*, 27370–27383.
201. Chafino, S.; López-Escardó, D.; Benelli, G.; Kovac, H.; Casacuberta, E.; Franch-Marro, X.; Kathirithamby, J.; Martín, D. Differential expression of the adult specifier E93 in the strepsipteran *Xenos vesparum* Rossi suggests a role in female neoteny. *Sci. Rep.* **2018**, *8*, 14176.
202. Goncu, E.; Parlak, O. Morphological changes and patterns of ecdysone receptor B1 immunolocalization in the anterior silk gland undergoing programmed cell death in the silkworm, *Bombyx mori*. *Acta Histochem.* **2009**, *111*, 25–34.
203. Wang, H.B.; Moriyama, M.; Iwanaga, M.; Kawasaki, H. Ecdysone directly and indirectly regulates a cuticle protein gene, *BMWCP10*, in the wing disc of *Bombyx mori*. *Insect Biochem. Mol. Biol.* **2010**, *40*, 453–459.
204. Monteiro, A.; Tong, X.; Bear, A.; Liew, S.F.; Bhardwaj, S.; Wasik, B.R.; Dinwiddie, A.; Bastianelli, C.; Cheong, W.F.; Wenk, M.R., et al. Differential expression of ecdysone receptor leads to variation in phenotypic plasticity across serial homologs. *PLoS Genet.* **2015**, *11*, e1005529.
205. Fichelson, P.; Brigui, A.; Pichaud, F. Orthodenticle and Kruppel homolog 1 regulate *Drosophila* photoreceptor maturation. *Proc. Natl. Acad. Sci. U. S. A.* **2012**, *109*, 7893–7898.
206. King-Jones, K.; Thummel, C.S. Nuclear receptors—a perspective from *Drosophila*. *Nat. Rev. Genet.* **2005**, *6*, 311–323.
207. Lenaerts, C.; Van Wielendaele, P.; Peeters, P.; Vanden Broeck, J.; Marchal, E. Ecdysteroid signalling components in metamorphosis and development of the desert locust, *Schistocerca gregaria*. *Insect Biochem. Mol. Biol.* **2016**, *75*, 10–23.
208. Van Doren, M.; Ellis, H.M.; Posakony, J.W. The *Drosophila extramacrochaetae* protein antagonizes sequence-specific DNA binding by *daughterless/achaete-scute* protein complexes. *Development* **1991**, *113*, 245–255.
209. Spratford, C.M.; Kumar, J.P. Extramacrochaetae functions in dorsal-ventral patterning of *Drosophila* imaginal discs. *Development* **2015**, *142*, 1006–1015.
210. Liu, W.; Chai, D.; Wang, C.; Li, Q.; Lei, J.; Yang, M.; Dai, F.; Lu, C. The *extramacrochaetae* gene is required for blastokinesis in silkworm, *Bombyx mori*. *J. Exp. Zool.* **2015**, *324B*, 405–409.
211. Sen, S.; Hartmann, B.; Reichert, H.; Rodrigues, V. Expression and function of the empty spiracles gene in olfactory sense organ development of *Drosophila melanogaster*. *Development* **2010**, *137*, 3687–3695.
212. Luo, L.; Siah, C.K.; Cai, Y. Engrailed acts with Nejure to control decapentaplegic expression in the *Drosophila* ovarian stem cell niche. *Development* **2017**, *144*, 3224–3231.
213. Koe, C.T.; Li, S.; Rossi, F.; Wong, J.J.; Wang, Y.; Zhang, Z.; Chen, K.; Aw, S.S.; Richardson, H.E.; Robson, P., et al. The Brm-HDAC3-Erm repressor complex suppresses dedifferentiation in *Drosophila* type II neuroblast lineages. *eLife* **2014**, *3*, e01906.
214. Janssens, D.H.; Komori, H.; Grbac, D.; Chen, K.; Koe, C.T.; Wang, H.; Lee, C.Y. Earmuff restricts progenitor cell potential by attenuating the competence to respond to self-renewal factors. *Development* **2014**, *141*, 1036–1046.
215. Shen, G.; Wu, J.; Han, C.; Liu, H.; Xu, Y.; Zhang, H.; Lin, Y.; Xia, Q. Oestrogen-related receptor reduces vitellogenin expression by crosstalk with the ecdysone receptor pathway in female silkworm, *Bombyx mori*. *Insect Mol. Biol.* **2018**, 10.1111/imb.12385.
216. Jin, W.; Jia, Y.; Tan, E.; Xi, G. Relevance of estrogen-related receptor gene and ecdysone receptor gene in adult testis of the cricket *Teleogryllus emma* (Orthoptera: Gryllidae). *Sci. Nat.* **2017**, *104*, 97.
217. Nakao, H. Analyses of interactions among pair-rule genes and the gap gene *Krüppel* in *Bombyx* segmentation. *Dev. Biol.* **2015**, *405*, 149–157.
218. Jafari, S.; Alkhori, L.; Schleiffer, A.; Brochtrup, A.; Hummel, T.; Alenius, M. Combinatorial activation and repression by seven transcription factors specify *Drosophila* odorant receptor expression. *PLoS Biol.* **2012**, *10*, e1001280.
219. Nagoshi, E.; Sugino, K.; Kula, E.; Okazaki, E.; Tachibana, T.; Nelson, S.; Rosbash, M. Dissecting differential gene expression within the circadian neuronal circuit of *Drosophila*. *Nat. Neurosci.* **2010**, *13*, 60–68.

220. Varma, D.; Bulow, M.H.; Pesch, Y.Y.; Loch, G.; Hoch, M. Forkhead, a new cross regulator of metabolism and innate immunity downstream of TOR in *Drosophila*. *J. Insect Physiol.* **2014**, *69*, 80–88.
221. Zhou, B.; Bagri, A.; Beckendorf, S.K. Salivary gland determination in *Drosophila*: a salivary-specific, *fork head* enhancer integrates spatial pattern and allows *fork head* autoregulation. *Dev. Biol.* **2001**, *237*, 54–67.
222. Abrams, E.W.; Mihoulides, W.K.; Andrew, D.J. Fork head and Sage maintain a uniform and patent salivary gland lumen through regulation of two downstream target genes, *PH4alphaSG1* and *PH4alphaSG2*. *Development* **2006**, *133*, 3517–3527.
223. Fox, R.M.; Vaishnavi, A.; Maruyama, R.; Andrew, D.J. Organ-specific gene expression: the bHLH protein Sage provides tissue specificity to *Drosophila* FoxA. *Development* **2013**, *140*, 2160–2171.
224. Myat, M.M.; Isaac, D.D.; Andrew, D.J. Early genes required for salivary gland fate determination and morphogenesis in *Drosophila melanogaster*. *Adv. Dent. Res.* **2000**, *14*, 89–98.
225. Chandrasekaran, V.; Beckendorf, S.K. *senseless* is necessary for the survival of embryonic salivary glands in *Drosophila*. *Development* **2003**, *130*, 4719–4728.
226. Lehmann, M.; Korge, G. The *fork head* product directly specifies the tissue-specific hormone responsiveness of the *Drosophila* *Sgs-4* gene. *EMBO J.* **1996**, *15*, 4825–4834.
227. Renault, N.; King-Jones, K.; Lehmann, M. Downregulation of the tissue-specific transcription factor Fork head by *Broad-Complex* mediates a stage-specific hormone response. *Development* **2001**, *128*, 3729–3737.
228. Liu, Y.; Lehmann, M. Genes and biological processes controlled by the *Drosophila* FOXA orthologue Fork head. *Insect Mol. Biol.* **2008**, *17*, 91–101.
229. Bülow, M.H.; Aebersold, R.; Pankratz, M.J.; Jünger, M.A. The *Drosophila* FoxA ortholog Fork head regulates growth and gene expression downstream of Target of rapamycin. *PLoS One* **2010**, *5*, e15171.
230. Zhao, X.; Liu, C.; Li, Q.; Hu, W.; Zhou, M.; Nie, H.; Zhang, Y.; Peng, Z.; Zhao, P.; Xia, Q. Basic helix-loop-helix transcription factor Bmsage is involved in regulation of *fibroin H-chain* gene via interaction with SGF1 in *Bombyx mori*. *PLoS One* **2014**, *9*, e94091.
231. Hui, C.C.; Matsuno, K.; Suzuki, Y. Fibroin gene promoter contains a cluster of homeodomain binding sites that interact with three silk gland factors. *J. Mol. Biol.* **1990**, *213*, 651–670.
232. Mach, V.; Takiya, S.; Ohno, K.; Handa, H.; Imai, T.; Suzuki, Y. Silk gland factor-1 involved in the regulation of *Bombyx* sericin-1 gene contains fork head motif. *J. Biol. Chem.* **1995**, *270*, 9340–9346.
233. Julien, E.; Bordeaux, M.C.; Garel, A.; Couble, P. Fork head alternative binding drives stage-specific gene expression in the silk gland of *Bombyx mori*. *Insect Biochem. Mol. Biol.* **2002**, *32*, 377–387.
234. Zhong, X.; Chowdhury, M.; Li, C.F.; Yu, X.Q. Transcription factor forkhead regulates expression of antimicrobial peptides in the tobacco hornworm, *Manduca sexta*. *Sci. Rep.* **2017**, *7*, 2688.
235. Bao, B.; Hong, B.; Feng, Q.L.; Xu, W.H. Transcription factor fork head regulates the promoter of diapause hormone gene in the cotton bollworm, *Helicoverpa armigera*, and the modification of SUMOylation. *Insect Biochem. Mol. Biol.* **2011**, *41*, 670–679.
236. Li, J.; Ma, Y.; Yuan, W.; Xiao, Y.; Liu, C.; Wang, J.; Peng, J.; Peng, R.; Soberón, M.; Bravo, A., et al. FOXA transcriptional factor modulates insect susceptibility to *Bacillus thuringiensis* Cry1Ac toxin by regulating the expression of toxin-receptor *ABCC2* and *ABCC3* genes. *Insect Biochem. Mol. Biol.* **2017**, *88*, 1–11.
237. Hanlon, C.D.; Andrew, D.J. *Drosophila* FoxL1 non-autonomously coordinates organ placement during embryonic development. *Dev. Biol.* **2016**, *419*, 273–284.
238. Ye, Y.X.; Pan, P.L.; Xu, J.Y.; Shen, Z.F.; Kang, D.; Lu, J.B.; Hu, Q.L.; Huang, H.J.; Lou, Y.H.; Zhou, N.M., et al. Forkhead box transcription factor L2 activates *Fcp3C* to regulate insect chorion formation. *Open Biol.* **2017**, *7*, 170061.
239. Vihervaara, T.; Puig, O. dFOXO regulates transcription of a *Drosophila* acid lipase. *J. Mol. Biol.* **2008**, *376*, 1215–1223.
240. Kang, P.; Chang, K.; Liu, Y.; Bouska, M.; Birnbaum, A.; Karashchuk, G.; Thakore, R.; Zheng, W.; Post, S.; Brent, C.S., et al. *Drosophila* Kruppel homolog 1 represses lipolysis through interaction with dFOXO. *Sci. Rep.* **2017**, *7*, 16369.

241. Becker, T.; Loch, G.; Beyer, M.; Zinke, I.; Aschenbrenner, A.C.; Carrera, P.; Inhester, T.; Schultze, J.L.; Hoch, M. FOXO-dependent regulation of innate immune homeostasis. *Nature* **2010**, *463*, 369–373.
242. Koyama, T.; Rodrigues, M.A.; Athanasiadis, A.; Shingleton, A.W.; Mirth, C.K. Nutritional control of body size through FoxO-Ultraspiracle mediated ecdysone biosynthesis. *eLife* **2014**, *3*, e03091.
243. Hossain, M.S.; Liu, Y.; Zhou, S.; Li, K.; Tian, L.; Li, S. 20-Hydroxyecdysone-induced transcriptional activity of FoxO upregulates *brummer* and *acid lipase-1* and promotes lipolysis in *Bombyx* fat body. *Insect Biochem. Mol. Biol.* **2013**, *43*, 829–838.
244. Zeng, B.; Huang, Y.; Xu, J.; Shiotsuki, T.; Bai, H.; Palli, S.R.; Huang, Y.; Tan, A. The FOXO transcription factor controls insect growth and development by regulating juvenile hormone degradation in the silkworm, *Bombyx mori*. *J. Biol. Chem.* **2017**, *292*, 11659–11669.
245. Baumann, A.A.; Benoit, J.B.; Michalkova, V.; Mireji, P.; Attardo, G.M.; Moulton, J.K.; Wilson, T.G.; Aksoy, S. Juvenile hormone and insulin suppress lipolysis between periods of lactation during tsetse fly pregnancy. *Mol. Cell. Endocrinol.* **2013**, *372*, 30–41.
246. Borrás-Castells, F.; Nieva, C.; Maestro, J.L.; Maestro, O.; Belles, X.; Martín, D. Juvenile hormone biosynthesis in adult *Blattella germanica* requires nuclear receptors Seven-up and FTZ-F1. *Sci. Rep.* **2017**, *7*, 40234.
247. Dubrovsky, E.B.; Dubrovskaya, V.A.; Bernardo, T.; Otte, V.; DiFilippo, R.; Bryan, H. The *Drosophila* FTZ-F1 nuclear receptor mediates juvenile hormone activation of *E75A* gene expression through an intracellular pathway. *J. Biol. Chem.* **2011**, *286*, 33689–33700.
248. Parvy, J.P.; Blais, C.; Bernard, F.; Warren, J.T.; Petryk, A.; Gilbert, L.I.; O'Connor, M.B.; Dauphin-Villemant, C. A role for  $\beta$ FTZ-F1 in regulating ecdysteroid titers during post-embryonic development in *Drosophila melanogaster*. *Dev. Biol.* **2005**, *282*, 84–94.
249. Parvy, J.P.; Wang, P.; Garrido, D.; Maria, A.; Blais, C.; Poidevin, M.; Montagne, J. Forward and feedback regulation of cyclic steroid production in *Drosophila melanogaster*. *Development* **2014**, *141*, 3955–3965.
250. Murata, T.; Kageyama, Y.; Hirose, S.; Ueda, H. Regulation of the *EDG84A* gene by FTZ-F1 during metamorphosis in *Drosophila melanogaster*. *Mol. Cell. Biol.* **1996**, *16*, 6509–6515.
251. Kawasaki, H.; Hirose, S.; Ueda, H.  $\beta$ FTZ-F1 dependent and independent activation of *Edg78E*, a pupal cuticle gene, during the early metamorphic period in *Drosophila melanogaster*. *Dev. Growth Differ.* **2002**, *44*, 419–425.
252. Akagi, K.; Kageyama, Y.; Kayashima, Y.; Takakura, Y.; Hirose, S.; Ueda, H. The binding of multiple nuclear receptors to a single regulatory region is important for the proper expression of *EDG84A* in *Drosophila melanogaster*. *J. Mol. Biol.* **2013**, *425*, 71–81.
253. Bond, N.D.; Nelliott, A.; Bernardo, M.K.; Ayerh, M.A.; Gorski, K.A.; Hoshizaki, D.K.; Woodard, C.T.  $\beta$ FTZ-F1 and Matrix metalloproteinase 2 are required for fat-body remodeling in *Drosophila*. *Dev. Biol.* **2011**, *360*, 286–296.
254. Deng, H.; Zheng, S.; Yang, X.; Liu, L.; Feng, Q. Transcription factors BmPOUM2 and Bm $\beta$ FTZ-F1 are involved in regulation of the expression of the wing cuticle protein gene *BmWCP4* in the silkworm, *Bombyx mori*. *Insect Mol. Biol.* **2011**, *20*, 45–60.
255. Shiomi, K.; Niimi, T.; Imai, K.; Yamashita, O. Structure of the VAP-peptide (*BmACP-6.7*) gene in the silkworm, *Bombyx mori* and a possible regulation of its expression by BmFTZ-F1. *Insect Biochem. Mol. Biol.* **2000**, *30*, 119–125.
256. Zhou, C.Y.; Zha, X.F.; Shi, P.P.; Zhao, P.; Wang, H.; Zheng, R.W.; Xia, Q.Y. Nuclear hormone receptor BmFTZ-F1 is involved in regulating the *fibroin heavy chain* gene in the silkworm, *Bombyx mori*. *Biochim. Biophys. Acta* **2016**, *1860*, 2529–2536.
257. Vyazunova, I.; Lan, Q. *Yellow fever mosquito sterol carrier protein-2* gene structure and transcriptional regulation. *Insect Mol. Biol.* **2010**, *19*, 205–215.
258. Swantek, D.; Gergen, J.P. Ftz modulates Runt-dependent activation and repression of segment-polarity gene transcription. *Development* **2004**, *131*, 2281–2290.
259. Hang, S.; Gergen, J.P. Different modes of enhancer-specific regulation by Runt and Even-skipped during *Drosophila* segmentation. *Mol. Biol. Cell* **2017**, *28*, 681–691.
260. Sourmeli, S.; Kravariti, L.; Lecanidou, R. In vitro analysis of *Bombyx mori* early chorion gene



- regulation: stage specific expression involves interactions with C/EBP-like and GATA factors. *Insect Biochem. Mol. Biol.* **2003**, *33*, 525–540.
261. Papantonis, A.; Vanden Broeck, J.; Lecanidou, R. Architectural factor HMGA induces promoter bending and recruits C/EBP and GATA during silkworm chorion gene regulation. *Biochem. J.* **2008**, *416*, 85–97.
  262. Rao, X.J.; Xu, X.X.; Yu, X.Q. *Manduca sexta* moricin promoter elements can increase promoter activities of *Drosophila melanogaster* antimicrobial peptide genes. *Insect Biochem. Mol. Biol.* **2011**, *41*, 982–992.
  263. Godlewski, J.; Wang, S.; Wilson, T.G. Interaction of bHLH-PAS proteins involved in juvenile hormone reception in *Drosophila*. *Biochem. Biophys. Res. Commun.* **2006**, *342*, 1305–1311.
  264. Janssens, H.; Hou, S.; Jaeger, J.; Kim, A.R.; Myasnikova, E.; Sharp, D.; Reinitz, J. Quantitative and predictive model of transcriptional control of the *Drosophila melanogaster even skipped* gene. *Nat. Genet.* **2006**, *38*, 1159–1165.
  265. Han, Z.; Yi, P.; Li, X.; Olson, E.N. Hand, an evolutionarily conserved bHLH transcription factor required for *Drosophila* cardiogenesis and hematopoiesis. *Development* **2006**, *133*, 1175–1182.
  266. Popichenko, D.; Sellin, J.; Bartkuhn, M.; Paululat, A. Hand is a direct target of the forkhead transcription factor Biniou during *Drosophila* visceral mesoderm differentiation. *BMC Dev. Biol.* **2007**, *7*, 49.
  267. Tögel, M.; Meyer, H.; Lehmacher, C.; Heinisch, J.J.; Pass, G.; Paululat, A. The bHLH transcription factor hand is required for proper wing heart formation in *Drosophila*. *Dev. Biol.* **2013**, *381*, 446–459.
  268. Hallier, B.; Hoffmann, J.; Roeder, T.; Tögel, M.; Meyer, H.; Paululat, A. The bHLH transcription factor Hand regulates the expression of genes critical to heart and muscle function in *Drosophila melanogaster*. *PLoS One* **2015**, *10*, e0134204.
  269. Saha, T.T.; Shin, S.W.; Dou, W.; Roy, S.; Zhao, B.; Hou, Y.; Wang, X.L.; Zou, Z.; Girke, T.; Raikhel, A.S. Hairy and Groucho mediate the action of juvenile hormone receptor Methoprene-tolerant in gene repression. *Proc. Natl. Acad. Sci. U. S. A.* **2016**, *113*, E735–E743.
  270. Nakao, H. Hunchback knockdown induces supernumerary segment formation in *Bombyx*. *Dev. Biol.* **2016**, *413*, 207–216.
  271. Isshiki, T.; Pearson, B.; Holbrook, S.; Doe, C.Q. *Drosophila* neuroblasts sequentially express transcription factors which specify the temporal identity of their neuronal progeny. *Cell* **2001**, *106*, 511–521.
  272. Torres-Oliva, M.; Schneider, J.; Wiegler, G.; Kaufholz, F.; Posnien, N. Dynamic genome wide expression profiling of *Drosophila* head development reveals a novel role of Hunchback in retinal glia cell development and blood-brain barrier integrity. *PLoS Genet.* **2018**, *14*, e1007180.
  273. Wang, X.; Hou, Y.; Saha, T.T.; Pei, G.; Raikhel, A.S.; Zou, Z. Hormone and receptor interplay in the regulation of mosquito lipid metabolism. *Proc. Natl. Acad. Sci. U. S. A.* **2017**, *114*, E2709–E2718.
  274. Georgias, C.; Wasser, M.; Hinz, U. A basic-helix-loop-helix protein expressed in precursors of *Drosophila* longitudinal visceral muscles. *Mech. Dev.* **1997**, *69*, 115–124.
  275. Shukla, V.; Habib, F.; Kulkarni, A.; Ratnaparkhi, G.S. Gene duplication, lineage-specific expansion, and subfunctionalization in the MADF-BESS family patterns the *Drosophila* wing hinge. *Genetics* **2014**, *196*, 481–496.
  276. Lam, G.; Hall, B.L.; Bender, M.; Thummel, C.S. *DHR3* is required for the prepupal-pupal transition and differentiation of adult structures during *Drosophila* metamorphosis. *Dev. Biol.* **1999**, *212*, 204–216.
  277. Ou, Q.; Magico, A.; King-Jones, K. Nuclear receptor DHR4 controls the timing of steroid hormone pulses during *Drosophila* development. *PLoS Biol.* **2011**, *9*, e1001160.
  278. Gu, S.H.; Hsieh, Y.C.; Lin, P.L. Stimulation of orphan nuclear receptor HR38 gene expression by PTH in prothoracic glands of the silkworm, *Bombyx mori*. *J. Insect Physiol.* **2016**, *90*, 8–16.
  279. King-Jones, K.; Horner, M.A.; Lam, G.; Thummel, C.S. The DHR96 nuclear receptor regulates xenobiotic responses in *Drosophila*. *Cell Metab.* **2006**, *4*, 37–48.
  280. Westwood, J.T.; Clos, J.; Wu, C. Stress-induced oligomerization and chromosomal relocalization of heat-shock factor. *Nature* **1991**, *353*, 822–827.
  281. Guertin, M.J.; Petesch, S.J.; Zobeck, K.L.; Min, I.M.; Lis, J.T. *Drosophila* heat shock system as a

- general model to investigate transcriptional regulation. *Cold Spring Harb. Symp. Quant. Biol.* **2010**, *75*, 1–9.
282. Kihara, F.; Niimi, T.; Yamashita, O.; Yaginuma, T. Heat shock factor binds to heat shock elements upstream of heat shock protein 70a and *Samui* genes to confer transcriptional activity in *Bombyx mori* diapause eggs exposed to 5 degrees C. *Insect Biochem. Mol. Biol.* **2011**, *41*, 843–851.
  283. Azpiazu, N.; Morata, G. Function and regulation of *homothorax* in the wing imaginal disc of *Drosophila*. *Development* **2000**, *127*, 2685–2693.
  284. Casares, F.; Mann, R.S. A dual role for *homothorax* in inhibiting wing blade development and specifying proximal wing identities in *Drosophila*. *Development* **2000**, *127*, 1499–1508.
  285. Niu, K.; Zhang, X.; Deng, H.; Wu, F.; Ren, Y.; Xiang, H.; Zheng, S.; Liu, L.; Huang, L.; Zeng, B., et al. BmILF and i-motif structure are involved in transcriptional regulation of *BmPOUM2* in *Bombyx mori*. *Nucleic Acids Res.* **2018**, *46*, 1710–1723.
  286. Danielsen, E.T.; Moeller, M.E.; Dorry, E.; Komura-Kawa, T.; Fujimoto, Y.; Troelsen, J.T.; Herder, R.; O'Connor, M.B.; Niwa, R.; Rewitz, K.F. Transcriptional control of steroid biosynthesis genes in the *Drosophila* prothoracic gland by ventral veins lacking and knirps. *PLoS Genet.* **2014**, *10*, e1004343.
  287. Mishra, A.K.; Bargmann, B.O.R.; Tsachaki, M.; Fritsch, C.; Sprecher, S.G. Functional genomics identifies regulators of the phototransduction machinery in the *Drosophila* larval eye and adult ocelli. *Dev. Biol.* **2016**, *410*, 164–177.
  288. Kayukawa, T.; Nagamine, K.; Ito, Y.; Nishita, Y.; Ishikawa, Y.; Shinoda, T. Krüppel homolog 1 inhibits insect metamorphosis via direct transcriptional repression of *Broad-Complex*, a pupal specifier gene. *J. Biol. Chem.* **2016**, *291*, 1751–1762.
  289. Kayukawa, T.; Jouraku, A.; Ito, Y.; Shinoda, T. Molecular mechanism underlying juvenile hormone-mediated repression of precocious larval-adult metamorphosis. *Proc. Natl. Acad. Sci. U. S. A.* **2017**, *114*, 1057–1062.
  290. Belles, X.; Santos, C.G. The MEKRE93 (Methoprene tolerant-Krüppel homolog 1-E93) pathway in the regulation of insect metamorphosis, and the homology of the pupal stage. *Insect Biochem. Mol. Biol.* **2014**, *52*, 60–68.
  291. Zhang, T.; Song, W.; Li, Z.; Qian, W.; Wei, L.; Yang, Y.; Wang, W.; Zhou, X.; Meng, M.; Peng, J., et al. Krüppel homolog 1 represses insect ecdysone biosynthesis by directly inhibiting the transcription of steroidogenic enzymes. *Proc. Natl. Acad. Sci. U. S. A.* **2018**, *115*, 3960–3965.
  292. Song, J.; Wu, Z.; Wang, Z.; Deng, S.; Zhou, S. Krüppel-homolog 1 mediates juvenile hormone action to promote vitellogenesis and oocyte maturation in the migratory locust. *Insect Biochem. Mol. Biol.* **2014**, *52*, 94–101.
  293. Urñina, E.; Chafino, S.; Manjón, C.; Franch-Marro, X.; Martín, D. The occurrence of the holometabolous pupal stage requires the interaction between E93, Krüppel-Homolog 1 and Broad-Complex. *PLoS Genet.* **2016**, *12*, e1006020.
  294. Smykal, V.; Bajgar, A.; Provaznik, J.; Fexova, S.; Buricova, M.; Takaki, K.; Hodkova, M.; Jindra, M.; Dolezel, D. Juvenile hormone signaling during reproduction and development of the linden bug, *Pyrrhocoris apterus*. *Insect Biochem. Mol. Biol.* **2014**, *45*, 69–76.
  295. Smith, R.C.; Eappen, A.G.; Radtke, A.J.; Jacobs-Lorena, M. Regulation of anti-*Plasmodium* immunity by a LITAF-like transcription factor in the malaria vector *Anopheles gambiae*. *PLoS Pathog.* **2012**, *8*, e1002965.
  296. Carmena, A.; Bate, M.; Jiménez, F. *lethal of scute*, a proneural gene, participates in the specification of muscle progenitors during *Drosophila* embryogenesis. *Genes Dev.* **1995**, *9*, 2373–2383.
  297. Kerman, B.E.; Cheshire, A.M.; Myat, M.M.; Andrew, D.J. Ribbon modulates apical membrane during tube elongation through Crumbs and Moesin. *Dev. Biol.* **2008**, *320*, 278–288.
  298. Certel, S.J.; Thor, S. Specification of *Drosophila* motoneuron identity by the combinatorial action of POU and LIM-HD factors. *Development* **2004**, *131*, 5429–5439.
  299. Steiger, D.; Furrer, M.; Schwinkendorf, D.; Gallant, P. Max-independent functions of Myc in *Drosophila melanogaster*. *Nat. Genet.* **2008**, *40*, 1084–1091.
  300. Kayukawa, T.; Minakuchi, C.; Namiki, T.; Togawa, T.; Yoshiyama, M.; Kamimura, M.; Mita, K.; Imanishi, S.; Kiuchi, M.; Ishikawa, Y., et al. Transcriptional regulation of juvenile hormone-mediated induction of Krüppel homolog 1, a repressor of insect metamorphosis. *Proc.*

- Natl. Acad. Sci. U. S. A.* **2012**, *109*, 11729–11734.
301. Kayukawa, T.; Shinoda, T. Functional characterization of two paralogous JH receptors, methoprene-tolerant 1 and 2, in the silkworm, *Bombyx mori* (Lepidoptera: Bombycidae). *Appl. Entomol. Zool.* **2015**, *50*, 383–391.
  302. Gujar, H.; Palli, S.R. Juvenile hormone regulation of female reproduction in the common bed bug, *Cimex lectularius*. *Sci. Rep.* **2016**, *6*, 35546.
  303. Liu, Y.; Sheng, Z.; Liu, H.; Wen, D.; He, Q.; Wang, S.; Shao, W.; Jiang, R.J.; An, S.; Sun, Y., et al. Juvenile hormone counteracts the bHLH-PAS transcription factors MET and GCE to prevent caspase-dependent programmed cell death in *Drosophila*. *Development* **2009**, *136*, 2015–2025.
  304. Meng, Q.W.; Xu, Q.Y.; Deng, P.; Fu, K.Y.; Guo, W.C.; Li, G.Q. Transcriptional response of Methoprene-tolerant (Met) gene to three insect growth disruptors in *Leptinotarsa decemlineata* (Say). *J. Asia Pac. Entomol.* **2018**, *21*, 466–473.
  305. Meng, Q.W.; Xu, Q.Y.; Deng, P.; Fu, K.Y.; Guo, W.C.; Li, G.Q. Involvement of methoprene-tolerant (Met) in the determination of the final body size in *Leptinotarsa decemlineata* (Say) larvae. *Insect Biochem. Mol. Biol.* **2018**, *97*, 1–9.
  306. Guo, W.; Wu, Z.; Song, J.; Jiang, F.; Wang, Z.; Deng, S.; Walker, V.K.; Zhou, S. Juvenile hormone-receptor complex acts on *Mcm4* and *Mcm7* to promote polyploidy and vitellogenesis in the migratory locust. *PLoS Genet.* **2014**, *10*, e1004702.
  307. Wu, Z.; Guo, W.; Xie, Y.; Zhou, S. Juvenile hormone activates the transcription of cell-division-cycle 6 (*Cdc6*) for polyploidy-dependent insect vitellogenesis and oogenesis. *J. Biol. Chem.* **2016**, *291*, 5418–5427.
  308. Luo, M.; Li, D.; Wang, Z.; Guo, W.; Kang, L.; Zhou, S. Juvenile hormone differentially regulates two Grp78 genes encoding protein chaperones required for insect fat body cell homeostasis and vitellogenesis. *J. Biol. Chem.* **2017**, *292*, 8823–8834.
  309. Hejnikova, M.; Paroulek, M.; Hodkova, M. Decrease in *Methoprene tolerant* and *Taiman* expression reduces juvenile hormone effects and enhances the levels of juvenile hormone circulating in males of the linden bug *Pyrrhocoris apterus*. *J. Insect Physiol.* **2016**, *93-94*, 72–80.
  310. Konopova, B.; Jindra, M. Juvenile hormone resistance gene *Methoprene-tolerant* controls entry into metamorphosis in the beetle *Tribolium castaneum*. *Proc. Natl. Acad. Sci. U. S. A.* **2007**, *104*, 10488–10493.
  311. Parthasarathy, R.; Tan, A.; Palli, S.R. bHLH-PAS family transcription factor methoprene-tolerant plays a key role in JH action in preventing the premature development of adult structures during larval-pupal metamorphosis. *Mech. Dev.* **2008**, *125*, 601–616.
  312. Minakuchi, C.; Namiki, T.; Shinoda, T. *Krüppel homolog 1*, an early juvenile hormone-response gene downstream of *Methoprene-tolerant*, mediates its anti-metamorphic action in the red flour beetle *Tribolium castaneum*. *Dev. Biol.* **2009**, *325*, 341–350.
  313. Charles, J.P.; Iwema, T.; Epa, V.C.; Takaki, K.; Rynes, J.; Jindra, M. Ligand-binding properties of a juvenile hormone receptor, *Methoprene-tolerant*. *Proc. Natl. Acad. Sci. U. S. A.* **2011**, *108*, 21128–21133.
  314. Kayukawa, T.; Tateishi, K.; Shinoda, T. Establishment of a versatile cell line for juvenile hormone signaling analysis in *Tribolium castaneum*. *Sci. Rep.* **2013**, *3*, 1570.
  315. Zhu, J.; Busche, J.M.; Zhang, X. Identification of juvenile hormone target genes in the adult female mosquitoes. *Insect Biochem. Mol. Biol.* **2010**, *40*, 23–29.
  316. Li, M.; Mead, E.A.; Zhu, J. Heterodimer of two bHLH-PAS proteins mediates juvenile hormone-induced gene expression. *Proc. Natl. Acad. Sci. U. S. A.* **2011**, *108*, 638–643.
  317. Zou, Z.; Saha, T.T.; Roy, S.; Shin, S.W.; Backman, T.W.; Girke, T.; White, K.P.; Raikhel, A.S. Juvenile hormone and its receptor, methoprene-tolerant, control the dynamics of mosquito gene expression. *Proc. Natl. Acad. Sci. U. S. A.* **2013**, *110*, E2173–E2181.
  318. Cui, Y.; Sui, Y.; Xu, J.; Zhu, F.; Palli, S.R. Juvenile hormone regulates *Aedes aegypti* *Krüppel* homolog 1 through a conserved E box motif. *Insect Biochem. Mol. Biol.* **2014**, *52*, 23–32.
  319. Shin, S.W.; Zou, Z.; Saha, T.T.; Raikhel, A.S. bHLH-PAS heterodimer of *Methoprene-tolerant* and *Cycle* mediates circadian expression of juvenile hormone-induced mosquito genes. *Proc. Natl. Acad. Sci. U. S. A.* **2012**, *109*, 16576–16581.

320. Takiya, S.; Inoue, H.; Kimoto, M. Novel enhancer and promoter elements indispensable for the tissue-specific expression of the *sericin-1* gene of the silkworm *Bombyx mori*. *Insect Biochem. Mol. Biol.* **2011**, *41*, 592–601.
321. Kimoto, M.; Kitagawa, T.; Kobayashi, I.; Nakata, T.; Kuroiwa, A.; Takiya, S. Inhibition of the binding of MSG-intermolt-specific complex, MIC, to the *sericin-1* gene promoter and *sericin-1* gene expression by POU-M1/SGF-3. *Dev. Genes Evol.* **2012**, *222*, 351–359.
322. Kimoto, M.; Tsubota, T.; Uchino, K.; Sezutsu, H.; Takiya, S. Hox transcription factor Antp regulates *sericin-1* gene expression in the terminal differentiated silk gland of *Bombyx mori*. *Dev. Biol.* **2014**, *386*, 64–71.
323. Fu, C.L.; Wang, X.F.; Cheng, Q.; Wang, D.; Hirose, S.; Liu, Q.X. The T-box transcription factor Midline regulates wing development by repressing *wingless* and *hedgehog* in *Drosophila*. *Sci. Rep.* **2016**, *6*, 27981.
324. Gaziova, I.; Bhat, K.M. Ancestry-independent fate specification and plasticity in the developmental timing of a typical *Drosophila* neuronal lineage. *Development* **2009**, *136*, 263–274.
325. Hallsson, J.H.; Hafliadóttir, B.S.; Stivers, C.; Odenwald, W.; Arnheiter, H.; Pignoni, F.; Steingrímsson, E. The basic helix-loop-helix leucine zipper transcription factor Mitf is conserved in *Drosophila* and functions in eye development. *Genetics* **2004**, *167*, 233–241.
326. Bouche, V.; Espinosa, A.P.; Leone, L.; Sardiello, M.; Ballabio, A.; Botas, J. *Drosophila* Mitf regulates the V-ATPase and the lysosomal-autophagic pathway. *Autophagy* **2016**, *12*, 484–498.
327. Neubueser, D.; Warren, J.T.; Gilbert, L.I.; Cohen, S.M. *molting defective* is required for ecdysone biosynthesis. *Dev. Biol.* **2005**, *280*, 362–372.
328. Ono, H.; Rewitz, K.F.; Shinoda, T.; Itoyama, K.; Petryk, A.; Rybczynski, R.; Jarcho, M.; Warren, J.T.; Marqués, G.; Shimell, M.J., et al. *Spook* and *Spookier* code for stage-specific components of the ecdysone biosynthetic pathway in *Diptera*. *Dev. Biol.* **2006**, *298*, 555–570.
329. Uryu, O.; Ou, Q.; Komura-Kawa, T.; Kamiyama, T.; Iga, M.; Syrzycka, M.; Hirota, K.; Kataoka, H.; Honda, B.M.; King-Jones, K., et al. Cooperative control of ecdysone biosynthesis in *Drosophila* by transcription factors Séance, Ouija board, and Molting defective. *Genetics* **2017**, *208*, 605–622.
330. Havula, E.; Teesalu, M.; Hyötyläinen, T.; Seppälä, H.; Hasygar, K.; Auvinen, P.; Orešič, M.; Sandmann, T.; Hietakangas, V. Mondo/ChREBP-Mlx-regulated transcriptional network is essential for dietary sugar tolerance in *Drosophila*. *PLoS Genet.* **2013**, *9*, e1003438.
331. Loo, L.W.; Secombe, J.; Little, J.T.; Carlos, L.S.; Yost, C.; Cheng, P.F.; Flynn, E.M.; Edgar, B.A.; Eisenman, R.N. The transcriptional repressor dMnt is a regulator of growth in *Drosophila melanogaster*. *Mol. Cell Biol.* **2005**, *25*, 7078–7091.
332. Paterson, B.M.; Shirakata, M.; Nakamura, S.; Dechesne, C.; Walldorf, U.; Eldridge, J.; Dubendorfer, A.; Frasch, M.; Gehring, W.J. Isolation and functional comparison of Dmyd, the *Drosophila* homologue of the vertebrate myogenic determination genes, with CMD1. *Symp. Soc. Exp. Biol.* **1992**, *46*, 89–109.
333. Schmidt, I.; Franzdóttir, S.R.; Edenfeld, G.; Rodrigues, F.; Zierau, A.; Klämbt, C. Transcriptional regulation of peripheral glial cell differentiation in the embryonic nervous system of *Drosophila*. *Glia* **2011**, *59*, 1264–1272.
334. Aufauvre, J.; Misme-Aucouturier, B.; Viguès, B.; Texier, C.; Delbac, F.; Blot, N. Transcriptome analyses of the honeybee response to *Nosema ceranae* and insecticides. *PLoS One* **2014**, *9*, e91686.
335. Braid, L.R.; Lee, W.; Uetrecht, A.C.; Swarup, S.; Papanianni, G.; Heiler, A.; Verheyen, E.M. Nemo phosphorylates Even-skipped and promotes Eve-mediated repression of *odd-skipped* in even parasegments during *Drosophila* embryogenesis. *Dev. Biol.* **2010**, *343*, 178–189.
336. Oyallon, J.; Apitz, H.; Miguel-Aliaga, I.; Timofeev, K.; Ferreira, L.; Salecker, I. Regulation of locomotion and motoneuron trajectory selection and targeting by the *Drosophila* homolog of Olig family transcription factors. *Dev. Biol.* **2012**, *369*, 261–276.
337. Chen, D.; Gu, T.; Pham, T.N.; Zachary, M.J.; Hewes, R.S. Regulatory mechanisms of metamorphic neuronal remodeling revealed through a genome-wide modifier screen in *Drosophila melanogaster*. *Genetics* **2017**, *206*, 1429–1443.
338. Zattara, E.E.; Macagno, A.L.M.; Busey, H.A.; Moczek, A.P. Development of functional ectopic compound eyes in scarabaeid beetles by knockdown of *orthodenticle*. *Proc. Natl. Acad. Sci. U. S. A.*

- 2017, 114, 12021–12026.
339. Heffer, A.; Pick, L. Conservation and variation in Hox genes: how insect models pioneered the evo-devo field. *Annu. Rev. Entomol.* **2013**, *58*, 161–179.
  340. Junell, A.; Uvell, H.; Pick, L.; Engström, Y. Isolation of regulators of *Drosophila* immune defense genes by a double interaction screen in yeast. *Insect Biochem. Mol. Biol.* **2007**, *37*, 202–212.
  341. Lin, S.C.; Lin, M.H.; Horváth, P.; Reddy, K.L.; Storti, R.V. PDP1, a novel *Drosophila* PAR domain bZIP transcription factor expressed in developing mesoderm, endoderm and ectoderm, is a transcriptional regulator of somatic muscle genes. *Development* **1997**, *124*, 4685–4696.
  342. Dzitoyeva, S.; Manev, H. Reduction of cellular lipid content by a knockdown of *Drosophila* PDP1 $\gamma$  and mammalian hepatic leukemia factor. *J. Lipids* **2013**, *2013*, 297932.
  343. Shiomi, K.; Fujiwara, Y.; Yasukochi, Y.; Kajiuura, Z.; Nakagaki, M.; Yaginuma, T. The Pitx homeobox gene in *Bombyx mori*: regulation of DH-PBAN neuropeptide hormone gene expression. *Mol. Cell. Neurosci.* **2007**, *34*, 209–218.
  344. Ohtsuka, K.; Atsumi, T.; Fukushima, Y.; Shiomi, K. Identification of a cis-regulatory element that directs prothoracicotropic hormone gene expression in the silkworm *Bombyx mori*. *Insect Biochem. Mol. Biol.* **2011**, *41*, 356–361.
  345. Zhu, S.; Barshow, S.; Wildonger, J.; Jan, L.Y.; Jan, Y.N. Ets transcription factor Pointed promotes the generation of intermediate neural progenitors in *Drosophila* larval brains. *Proc. Natl. Acad. Sci. U. S. A.* **2011**, *108*, 20615–20620.
  346. Xie, Y.; Li, X.; Deng, X.; Hou, Y.; O'Hara, K.; Urso, A.; Peng, Y.; Chen, L.; Zhu, S. The Ets protein Pointed prevents both premature differentiation and dedifferentiation of *Drosophila* intermediate neural progenitors. *Development* **2016**, *143*, 3109–3118.
  347. Fukuta, M.; Matsuno, K.; Hui, C.C.; Nagata, T.; Takiya, S.; Xu, P.X.; Ueno, K.; Suzuki, Y. Molecular cloning of a POU domain-containing factor involved in the regulation of the *Bombyx sericin-1* gene. *J. Biol. Chem.* **1993**, *268*, 19471–19475.
  348. Sharma, V.; Pandey, A.K.; Kumar, A.; Misra, S.; Gupta, H.P.K.; Gupta, S.; Singh, A.; Buehner, N.A.; Ravi Ram, K. Functional male accessory glands and fertility in *Drosophila* require novel ecdysone receptor. *PLoS Genet.* **2017**, *13*, e1006788.
  349. Zhao, J.; Liu, X.N.; Li, F.; Zhuang, S.Z.; Huang, L.N.; Ma, J.; Gao, X.W. Yeast one-hybrid screening the potential regulator of CYP6B6 overexpression of *Helicoverpa armigera* under 2-tridecanone stress. *Bull. Entomol. Res.* **2016**, *106*, 182–190.
  350. Szuplewski, S.; Kottler, B.; Terracol, R. The *Drosophila* bZIP transcription factor Vrille is involved in hair and cell growth. *Development* **2003**, *130*, 3651–3662.
  351. Szuplewski, S.; Fraisse-Véron, I.; George, H.; Terracol, R. *vrille* is required to ensure tracheal integrity in *Drosophila* embryo. *Dev. Growth Differ.* **2010**, *52*, 409–418.
  352. Monnier, V.; Iché-Torres, M.; Rera, M.; Contremoulins, V.; Guichard, C.; Lalevée, N.; Tricoire, H.; Perrin, L. dJun and Vri/dNFIL3 are major regulators of cardiac aging in *Drosophila*. *PLoS Genet.* **2012**, *8*, e1003081.
  353. Gunawardhana, K.L.; Hardin, P.E. VRILLE controls PDF neuropeptide accumulation and arborization rhythms in small ventrolateral neurons to drive rhythmic behavior in *Drosophila*. *Curr. Biol.* **2017**, *27*, 3442–3453.
  354. Hanniger, S.; Dumas, P.; Schofl, G.; Gebauer-Jung, S.; Vogel, H.; Unbehend, M.; Heckel, D.G.; Groot, A.T. Genetic basis of allochronic differentiation in the fall armyworm. *BMC Evol. Biol.* **2017**, *17*, 68.
  355. Liu, L.; Li, Y.; Wang, Y.; Zhao, P.; Wei, S.; Li, Z.; Chang, H.; He, H. Biochemical characterization and functional analysis of the POU transcription factor POU-M2 of *Bombyx mori*. *Int. J. Biol. Macromol.* **2016**, *86*, 701–708.
  356. Meng, M.; Cheng, D.J.; Peng, J.; Qian, W.L.; Li, J.R.; Dai, D.D.; Zhang, T.L.; Xia, Q.Y. The homeodomain transcription factors antennapedia and POU-M2 regulate the transcription of the steroidogenic enzyme gene *Phantom* in the silkworm. *J. Biol. Chem.* **2015**, *290*, 24438–24452.
  357. Zhang, T.Y.; Kang, L.; Zhang, Z.F.; Xu, W.H. Identification of a POU factor involved in regulating the neuron-specific expression of the gene encoding diapause hormone and pheromone biosynthesis-activating neuropeptide in *Bombyx mori*. *Biochem. J.* **2004**, *380*, 255–263.

358. Cheng, C.; Ko, A.; Chaieb, L.; Koyama, T.; Sarwar, P.; Mirth, C.K.; Smith, W.A.; Suzuki, Y. The POU factor Ventral veins lacking/Drifter directs the timing of metamorphosis through ecdysteroid and juvenile hormone signaling. *PLoS Genet.* **2014**, *10*, e1004425.
359. Zhang, T.Y.; Xu, W.H. Identification and characterization of a POU transcription factor in the cotton bollworm, *Helicoverpa armigera*. *BMC Mol. Biol.* **2009**, *10*, 25.
360. Song, Z.; Yang, Y.P.; Xu, W.H. PTEN expression responds to transcription factor POU and regulates p-AKT levels during diapause initiation in the cotton bollworm, *Helicoverpa armigera*. *Insect Biochem. Mol. Biol.* **2018**, *100*, 48–58.
361. Stöven, S.; Ando, I.; Kadalayil, L.; Engström, Y.; Hultmark, D. Activation of the *Drosophila* NF- $\kappa$ B factor Relish by rapid endoproteolytic cleavage. *EMBO Rep.* **2000**, *1*, 347–352.
362. Hetru, C.; Hoffmann, J.A. NF- $\kappa$ B in the immune response of *Drosophila*. *Cold Spring Harb. Perspect. Biol.* **2009**, *1*, a000232.
363. Zhang, Y.; Lu, Y.X.; Liu, J.; Yang, C.; Feng, Q.L.; Xu, W.H. A regulatory pathway, ecdysone-transcription factor Relish-cathepsin L, is involved in insect fat body dissociation. *PLoS Genet.* **2013**, *9*, e1003273.
364. Meister, S.; Kanzok, S.M.; Zheng, X.L.; Luna, C.; Li, T.R.; Hoa, N.T.; Clayton, J.R.; White, K.P.; Kafatos, F.C.; Christophides, G.K., et al. Immune signaling pathways regulating bacterial and malaria parasite infection of the mosquito *Anopheles gambiae*. *Proc. Natl. Acad. Sci. U. S. A.* **2005**, *102*, 11420–11425.
365. Shin, S.W.; Kokoza, V.; Bian, G.; Cheon, H.M.; Kim, Y.J.; Raikhel, A.S. REL1, a homologue of *Drosophila* Dorsal, regulates Toll antifungal immune pathway in the female mosquito *Aedes aegypti*. *J. Biol. Chem.* **2005**, *280*, 16499–16507.
366. Shin, S.W.; Kokoza, V.; Ahmed, A.; Raikhel, A.S. Characterization of three alternatively spliced isoforms of the Rel/NF-kappa B transcription factor Relish from the mosquito *Aedes aegypti*. *Proc. Natl. Acad. Sci. U. S. A.* **2002**, *99*, 9978–9983.
367. Shin, S.W.; Kokoza, V.; Lobkov, I.; Raikhel, A.S. Relish-mediated immune deficiency in the transgenic mosquito *Aedes aegypti*. *Proc. Natl. Acad. Sci. U. S. A.* **2003**, *100*, 2616–2621.
368. Antonova, Y.; Alvarez, K.S.; Kim, Y.J.; Kokoza, V.; Raikhel, A.S. The role of NF- $\kappa$ B factor REL2 in the *Aedes aegypti* immune response. *Insect Biochem. Mol. Biol.* **2009**, *39*, 303–314.
369. Paradkar, P.N.; Duchemin, J.-B.; Voysey, R.; Walker, P.J. Dicer-2-dependent activation of *Culex Vago* occurs via the TRAF-Rel2 signaling pathway. In *PLoS Negl. Trop. Dis.*, 2014; Vol. 8, p e2823.
370. Tanaka, H.; Yamamoto, M.; Moriyama, Y.; Yamao, M.; Furukawa, S.; Sagisaka, A.; Nakazawa, H.; Mori, H.; Yamakawa, M. A novel Rel protein and shortened isoform that differentially regulate antibacterial peptide genes in the silkworm *Bombyx mori*. *Biochim. Biophys. Acta* **2005**, *1730*, 10–21.
371. Tanaka, H.; Matsuki, H.; Furukawa, S.; Sagisaka, A.; Kotani, E.; Mori, H.; Yamakawa, M. Identification and functional analysis of Relish homologs in the silkworm, *Bombyx mori*. *Biochim. Biophys. Acta* **2007**, *1769*, 559–568.
372. Sagisaka, A.; Tanaka, H.; Furukawa, S.; Yamakawa, M. Characterization of a homologue of the Rel/NF- $\kappa$ B transcription factor from a beetle, *Allomyrina dichotoma*. *Biochim. Biophys. Acta* **2004**, *1678*, 85–93.
373. Loganathan, R.; Lee, J.S.; Wells, M.B.; Grevengoed, E.; Slattery, M.; Andrew, D.J. *Ribbon* regulates morphogenesis of the *Drosophila* embryonic salivary gland through transcriptional activation and repression. *Dev. Biol.* **2016**, *409*, 234–250.
374. Kramer, S.G.; Jinks, T.M.; Schedl, P.; Gergen, J.P. Direct activation of *Sex-lethal* transcription by the *Drosophila* Runt protein. *Development* **1999**, *126*, 191–200.
375. Stoehr, A.M.; Walker, J.F.; Monteiro, A. Spalt expression and the development of melanic color patterns in pierid butterflies. *EvoDevo* **2013**, *4*, 6.
376. Futahashi, R.; Shirataki, H.; Narita, T.; Mita, K.; Fujiwara, H. Comprehensive microarray-based analysis for stage-specific larval camouflage pattern-associated genes in the swallowtail butterfly, *Papilio xuthus*. *BMC Biol.* **2012**, *10*, 46.
377. Salz, H.K.; Erickson, J.W. Sex determination in *Drosophila*: The view from the top. *Fly* **2010**, *4*, 60–70.
378. Panzer, S.; Weigel, D.; Beckendorf, S.K. Organogenesis in *Drosophila melanogaster*: embryonic

- salivary gland determination is controlled by homeotic and dorsoventral patterning genes. *Development* **1992**, *114*, 49–57.
379. Ryoo, H.D.; Mann, R.S. The control of trunk Hox specificity and activity by Extradenticle. *Genes Dev.* **1999**, *13*, 1704–1716.
  380. Henderson, K.D.; Andrew, D.J. Regulation and function of *Scr*, *exd*, and *hth* in the *Drosophila* salivary gland. *Dev. Biol.* **2000**, *217*, 362–374.
  381. Papadopoulos, D.K.; Skouloudaki, K.; Adachi, Y.; Samakovlis, C.; Gehring, W.J. Dimer formation via the homeodomain is required for function and specificity of Sex combs reduced in *Drosophila*. *Dev. Biol.* **2012**, *367*, 78–89.
  382. Kokubo, H.; Ueno, K.; Amanai, K.; Suzuki, Y. Involvement of the *Bombyx Scr* gene in development of the embryonic silk gland. *Dev. Biol.* **1997**, *186*, 46–57.
  383. Ma, L.; Li, K.; Guo, Y.; Sun, X.; Deng, H.; Li, K.; Feng, Q.; Li, S. Ras-Raf-MAPK signaling promotes nuclear localization of FOXA transcription factor SGF1 via Ser91 phosphorylation. *Biochim. Biophys. Acta.* **2018**, *1865*, 560–571.
  384. Franks, R.G.; Crews, S.T. Transcriptional activation domains of the *single-minded* bHLH protein are required for CNS midline cell development. *Mech. Dev.* **1994**, *45*, 269–277.
  385. Hong, J.W.; Park, K.W.; Levine, M.S. Temporal regulation of *single-minded* target genes in the ventral midline of the *Drosophila* central nervous system. *Dev. Biol.* **2013**, *380*, 335–343.
  386. Lavista-Llanos, S.; Centanin, L.; Irisarri, M.; Russo, D.M.; Gleadle, J.M.; Bocca, S.N.; Muzzopappa, M.; Ratcliffe, P.J.; Wappner, P. Control of the hypoxic response in *Drosophila melanogaster* by the basic helix-loop-helix PAS protein similar. *Mol. Cell Biol.* **2002**, *22*, 6842–6853.
  387. Mukherjee, T.; Kim, W.S.; Mandal, L.; Banerjee, U. Interaction between Notch and Hif- $\alpha$  in development and survival of *Drosophila* blood cells. *Science* **2011**, *332*, 1210–1213.
  388. Erickson, J.W.; Cline, T.W. A bZIP protein, Sisterless-a, collaborates with bHLH transcription factors early in *Drosophila* development to determine sex. *Genes Dev.* **1993**, *7*, 1688–1702.
  389. Walker, J.J.; Lee, K.K.; Desai, R.N.; Erickson, J.W. The *Drosophila melanogaster* sex determination gene *sisA* is required in yolk nuclei for midgut formation. *Genetics* **2000**, *155*, 191–202.
  390. Möller, A.; Avila, F.W.; Erickson, J.W.; Jäckle, H. *Drosophila* BAP60 is an essential component of the Brahma complex, required for gene activation and repression. *J. Mol. Biol.* **2005**, *352*, 329–337.
  391. Ashraf, S.I.; Hu, X.; Roote, J.; Ip, Y.T. The mesoderm determinant Snail collaborates with related zinc-finger proteins to control *Drosophila* neurogenesis. *EMBO J.* **1999**, *18*, 6426–6438.
  392. Ashraf, S.I.; Ip, Y.T. The Snail protein family regulates neuroblast expression of *inscuteable* and *string*, genes involved in asymmetry and cell division in *Drosophila*. *Development* **2001**, *128*, 4757–4767.
  393. Lai, S.L.; Miller, M.R.; Robinson, K.J.; Doe, C.Q. The Snail family member Worniu is continuously required in neuroblasts to prevent Elav-induced premature differentiation. *Dev. Cell* **2012**, *23*, 849–857.
  394. Wei, L.; Cheng, D.; Li, D.; Meng, M.; Peng, L.; Tang, L.; Pan, M.; Xiang, Z.; Xia, Q.; Lu, C. Identification and characterization of Sox genes in the silkworm, *Bombyx mori*. *Mol. Biol. Rep.* **2011**, *38*, 3573–3584.
  395. Shiraishi, H.; Kobayashi, A.; Sakamoto, Y.; Nonaka, T.; Mitsui, Y.; Aozasa, N.; Kubo, T.; Natori, S. Molecular cloning and characterization of SRAM, a novel insect Rel/Ankyrin-family protein present in nuclei. *J. Biochem.* **2000**, *127*, 1127–1134.
  396. Kunte, A.S.; Matthews, K.A.; Rawson, R.B. Fatty acid auxotrophy in *Drosophila* larvae lacking SREBP. *Cell Metab.* **2006**, *3*, 439–448.
  397. Meltzer, S.; Bagley, J.A.; Perez, G.L.; O'Brien, C.E.; DeVault, L.; Guo, Y.; Jan, L.Y.; Jan, Y.N. Phospholipid homeostasis regulates dendrite morphogenesis in *Drosophila* sensory neurons. *Cell Rep.* **2017**, *21*, 859–866.
  398. Gujar, H.; Palli, S.R. Krüppel homolog 1 and E93 mediate Juvenile hormone regulation of metamorphosis in the common bed bug, *Cimex lectularius*. *Sci. Rep.* **2016**, *6*, 26092.
  399. Emmons, R.B.; Duncan, D.; Duncan, I. Regulation of the *Drosophila* distal antennal determinant *spineless*. *Dev. Biol.* **2007**, *302*, 412–426.
  400. Kwon, E.J.; Park, H.S.; Kim, Y.S.; Oh, E.J.; Nishida, Y.; Matsukage, A.; Yoo, M.A.; Yamaguchi, M.

- Transcriptional regulation of the *Drosophila raf* proto-oncogene by *Drosophila* STAT during development and in immune response. *J. Biol. Chem.* **2000**, *275*, 19824–19830.
401. Gupta, L.; Molina-Cruz, A.; Kumar, S.; Rodrigues, J.; Dixit, R.; Zamora, R.E.; Barillas-Mury, C. The STAT pathway mediates late-phase immunity against *Plasmodium* in the mosquito *Anopheles gambiae*. *Cell Host Microbe* **2009**, *5*, 498–507.
  402. Kanai, M.I.; Okabe, M.; Hiromi, Y. seven-up controls switching of transcription factors that specify temporal identities of *Drosophila* neuroblasts. *Dev. Cell* **2005**, *8*, 203–213.
  403. Maurange, C.; Cheng, L.; Gould, A.P. Temporal transcription factors and their targets schedule the end of neural proliferation in *Drosophila*. *Cell* **2008**, *133*, 891–902.
  404. Berndt, A.J.; Tang, J.C.; Ridyard, M.S.; Lian, T.; Keatings, K.; Allan, D.W. Gene regulatory mechanisms underlying the spatial and temporal regulation of target-dependent gene expression in *Drosophila* neurons. *PLoS Genet.* **2015**, *11*, e1005754.
  405. Sonnenfeld, M.; Ward, M.; Nystrom, G.; Mosher, J.; Stahl, S.; Crews, S. The *Drosophila tango* gene encodes a bHLH-PAS protein that is orthologous to mammalian Arnt and controls CNS midline and tracheal development. *Development* **1997**, *124*, 4571–4582.
  406. Emmons, R.B.; Duncan, D.; Estes, P.A.; Kiefel, P.; Mosher, J.T.; Sonnenfeld, M.; Ward, M.P.; Duncan, I.; Crews, S.T. The Spineless-Aristopedia and Tango bHLH-PAS proteins interact to control antennal and tarsal development in *Drosophila*. *Development* **1999**, *126*, 3937–3945.
  407. Morozova, T.; Hackett, J.; Sedaghat, Y.; Sonnenfeld, M. The *Drosophila jing* gene is a downstream target in the Trachealess/Tango tracheal pathway. *Dev. Genes Evol.* **2010**, *220*, 191–206.
  408. Schmidt, J.M.; Good, R.T.; Appleton, B.; Sherrard, J.; Raymant, G.C.; Bogwitz, M.R.; Martin, J.; Daborn, P.J.; Goddard, M.E.; Batterham, P., et al. Copy number variation and transposable elements feature in recent, ongoing adaptation at the *Cyp6g1* locus. *PLoS Genet.* **2010**, *6*, e1000998.
  409. Jiang, Y.D.; Yuan, X.; Bai, Y.L.; Wang, G.Y.; Zhou, W.W.; Zhu, Z.R. Knockdown of *timeless* Disrupts the Circadian Behavioral Rhythms in *Laodelphax striatellus* (Hemiptera: Delphacidae). *Environ. Entomol.* **2018**, *47*, 1216–1225.
  410. Steingrimsson, E.; Pignoni, F.; Liaw, G.J.; Lengyel, J.A. Dual role of the *Drosophila* pattern gene *tailless* in embryonic termini. *Science* **1991**, *254*, 418–421.
  411. Mishra, A.K.; Bernardo-Garcia, F.J.; Fritsch, C.; Humberg, T.H.; Egger, B.; Sprecher, S.G. Patterning mechanisms diversify neuroepithelial domains in the *Drosophila* optic placode. *PLoS Genet.* **2018**, *14*, e1007353.
  412. Czerny, T.; Halder, G.; Kloter, U.; Souabni, A.; Gehring, W.J.; Busslinger, M. *twin of eyeless*, a second Pax-6 gene of *Drosophila*, acts upstream of *eyeless* in the control of eye development. *Mol. Cell* **1999**, *3*, 297–307.
  413. Castanon, I.; Von Stetina, S.; Kass, J.; Baylies, M.K. Dimerization partners determine the activity of the Twist bHLH protein during *Drosophila* mesoderm development. *Development* **2001**, *128*, 3145–3159.
  414. Li, H.; Qi, Y.; Jasper, H. Ubx dynamically regulates Dpp signaling by repressing Dad expression during copper cell regeneration in the adult *Drosophila* midgut. *Dev. Biol.* **2016**, *419*, 373–381.
  415. Tong, X.L.; Fu, M.Y.; Chen, P.; Chen, L.; Xiang, Z.H.; Lu, C.; Dai, F.Y. Ultrabithorax and abdominal-A specify the abdominal appendage in a dosage-dependent manner in silkworm, *Bombyx mori*. *Heredity* **2017**, *118*, 578–584.
  416. Olenkina, O.M.; Egorova, K.S.; Kibanov, M.V.; Gervaziev, Y.V.; Gvozdev, V.A.; Olenina, L.V. Promoter contribution to the testis-specific expression of *Stellate* gene family in *Drosophila melanogaster*. *Gene* **2012**, *499*, 143–153.
  417. Warren, J.T.; Wismar, J.; Subrahmanyam, B.; Gilbert, L.I. *Woc* (*without children*) gene control of ecdysone biosynthesis in *Drosophila melanogaster*. *Mol. Cell Endocrinol.* **2001**, *181*, 1–14.
  418. Liang, H.L.; Nien, C.Y.; Liu, H.Y.; Metzstein, M.M.; Kirov, N.; Rushlow, C. The zinc-finger protein Zelda is a key activator of the early zygotic genome in *Drosophila*. *Nature* **2008**, *456*, 400–403.
  419. Struffi, P.; Corado, M.; Kaplan, L.; Yu, D.; Rushlow, C.; Small, S. Combinatorial activation and concentration-dependent repression of the *Drosophila even skipped stripe 3+7* enhancer. *Development* **2011**, *138*, 4291–4299.
  420. Lai, Z.C.; Fortini, M.E.; Rubin, G.M. The embryonic expression patterns of *zfh-1* and *zfh-2*, two



*Drosophila* genes encoding novel zinc-finger homeodomain proteins. *Mech. Dev.* **1991**, *34*, 123–134.  
421. Myllymäki, H.; Rämetsä, M. Transcription factor *zfh1* downregulates *Drosophila* Imd pathway. *Dev. Comp. Immunol.* **2013**, *39*, 188–197.

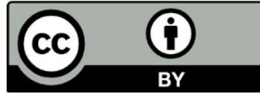

© 2018 by the authors. Submitted for possible open access publication under the terms and conditions of the Creative Commons Attribution (CC BY) license (<http://creativecommons.org/licenses/by/4.0/>).
